# Supplementary material for: Specificity of resistance and geographic patterns of virulence in a vertebrate host-parasite system
Source: PubMed Central journal article supplement (PMC6425677; doi:10.1186/s12862-019-1406-3), 2019-03-19
Supplement: 12862_2019_1406_MOESM1_ESM.pdf [file 12862_2019_1406_MOESM1_ESM.pdf]

## Additional file 1: Supplementary information

|                                                                                                |    |
|------------------------------------------------------------------------------------------------|----|
| SI.1 Supplementary information on infection rates.....                                         | 1  |
| SI.2 Supplementary information on parasite indices ( <i>contrast 1</i> ) .....                 | 5  |
| SI.3 Supplementary information on host condition and immunological parameters .....            | 7  |
| SI.4 Supplementary information on host immune gene expression ( <i>contrast 1</i> ) .....      | 13 |
| SI.4.1 Stickleback immune gene expression differences between populations .....                | 13 |
| SI.5 Supplementary information for <i>contrast 2</i> and <i>contrast 3</i> .....               | 16 |
| SI.5.1 Stickleback immune gene expression according to clustered localities of parasites ..... | 18 |
| SI.5.2 Stickleback immune gene expression in infected versus control fish .....                | 22 |
| SI.5.3 NMDS: infected versus control DE sticklebacks ( <i>contrast 2</i> ) .....               | 27 |
| SI.5.4 NMDS: infected versus control NO sticklebacks ( <i>contrast 3</i> ) .....               | 31 |
| SI.5.5 NMDS: infected versus control DE sticklebacks (in <i>contrast 1</i> ) .....             | 35 |
| References .....                                                                               | 36 |

**Table S1.** Parasite sampling sites

| ID  | Origin                               |          | Geo-coordinates   |
|-----|--------------------------------------|----------|-------------------|
| ECH | Echo Lake, Vancouver Island          | Canada   | 49°98'N, 125°41'W |
| ISC | Lake Myvatn                          | Iceland  | 65°39'N, 16°57'W  |
| NU  | North Uist<br>(Loch Eubhal/ Grogary) | Scotland | 57°34'N, 07°17'W  |
| SKO | Skogseidvatnet                       | Norway   | 60°13'N, 05°53'E  |
| SP  | Xinzo de Limia                       | Spain    | 42°08'N, 07°39'W  |
| IBB | Ibbenbürener Aa                      | Germany  | 52°17'N, 07°36'E  |
| NST | Neustädter Binnenwasser              | Germany  | 54°06'N, 10°48'E  |
| GOT | Gotland                              | Sweden   | 57°54'N, 18°56'E  |
| OBB | Obbola                               | Sweden   | 63°39'N, 20°17'E  |

### SI.1 Supplementary information on infection rates

If not stated otherwise, infection rates were calculated by using the number of infected individuals as proportional data in generalized mixed effects models (GLMMs) with binomial error structure and logit link function using the `glmer()` function of the *lme4* R package (Bates et al., 2014). Significantly different groups were identified with `glht()` post hoc tests from the

*multcomp* package (Hothorn et al., 2008). Infection rates differed considerably between parasite sibships and fish families; some parasite sibships failed to infect any fish. According to our experimental design, however, we did not test for fish family or parasite sibship effects. Parasite sibship was included as a random factor in analyses of infection rates in copepods; the random term 'round' (i.e. parasite sibship x fish family combination) was included in all analyses of the interaction between *S. solidus* and its fish hosts.

As expected for the unspecific first intermediate host, *S. solidus* from every origin managed to infect *M. albidus* copepods. We tested for potential differences in infection rates in copepods between the two years of the experiment by using data from parasite sibships that were used in both years (Table S2). Indeed, infection rates of parasites from NU and SKO were significantly higher in 2014 (NU:  $z = 4.472$ ,  $p < 0.0001$ ; SKO:  $z = 6.214$ ,  $p < 0.0001$ ). Testing each year separately, infection rates did not differ significantly between parasite populations in 2014; in 2015, ISC *S. solidus* infected significantly more copepods than parasites from GOT ( $z = -5.289$ ,  $p < 0.001$ ), NU ( $z = 4.416$ ,  $p < 0.001$ ), OBB ( $z = 3.615$ ,  $p < 0.01$ ), SKO ( $z = 3.948$ ,  $p < 0.01$ ), SP ( $z = 4.115$ ,  $p < 0.01$ ); IBB *S. solidus* infected significantly more copepods than *S. solidus* from GOT ( $z = -4.638$ ,  $p < 0.001$ ), NU ( $z = 3.76$ ,  $p < 0.01$ ), SKO ( $z = 3.275$ ,  $p = 0.029$ ), and SP ( $z = 3.453$ ,  $p = 0.016$ ); ECH *S. solidus* infected significantly more copepods than *S. solidus* from GOT ( $z = 4.148$ ,  $p < 0.01$ ) and NU ( $z = 3.299$ ,  $p = 0.027$ ). Using the sibship of the parasite as explanatory instead of the origin improved the model fit, pointing towards sibship- rather than origin-effects. Interestingly, Pacific (ECH) parasites had the highest infection rates in copepods and the lowest infection rates in sticklebacks. However, overall, and consistent with previous publications (Hammerschmidt and Kurtz, 2005), infection rates in copepods did not influence infection rates in fish.

Infection rates in fish did not differ significantly between the two years of the experiment (DE data;  $X^2_5 = 9.42$ ,  $p = 0.094$ ). *S. solidus* origin influenced the infection rates in NO hosts ( $X^2_8 = 21.619$ ,  $p = 0.006$ ). This was driven by significant differences between infections with NU versus ECH parasites ( $z = -3.446$ ,  $p = 0.016$ ). NU *S. solidus* had the overall highest infection rate (average: 40 %) and ECH *S. solidus* had the lowest infection rate (average: 9 %). The variance terms for the random effect differed between the experiments, which indicates different parasite sibship x fish family effects; namely, lower variance in DE in *contrast 1*. Fish

from the naturally highly parasitized Norwegian (NO) population ate considerably less infected copepods than DE fish, so we tested for a possible link between the number of ingested copepods and infection success. There was no consistent pattern; the number of infected copepods correlated with an increase or decrease of the infection rates, dependent on the origin of the parasite and the fish population (not shown). Accordingly and in line with the literature (Wedekind and Milinski, 1996), our data does not indicate avoidance behaviour.

**Table S2.** Infection rates of *S. solidus* in its first intermediate host (*M. albidus*)

| Year of the experiment | Parasite sibship | Parasite origin | Infected copepods | Uninfected copepods | Infection rate | Average per origin and experiment |
|------------------------|------------------|-----------------|-------------------|---------------------|----------------|-----------------------------------|
| 2014                   | ECH_3x10         | ECH             | 51                | 38                  | 0.57           |                                   |
| 2014                   | ECH_6x23         | ECH             | 69                | 17                  | 0.80           |                                   |
| 2014                   | ECH_9x14         | ECH             | 61                | 17                  | 0.78           | 0.72                              |
| 2014                   | GOT_10x12        | GOT             | 44                | 42                  | 0.51           |                                   |
| 2014                   | GOT_13x8         | GOT             | 24                | 62                  | 0.28           |                                   |
| 2014                   | GOT_1x5          | GOT             | 48                | 38                  | 0.56           | 0.45                              |
| 2014                   | NST_13x14        | NST             | 51                | 29                  | 0.64           |                                   |
| 2014                   | NST_2x7          | NST             | 46                | 37                  | 0.55           |                                   |
| 2014                   | NST_8x9          | NST             | 43                | 80                  | 0.35           | 0.51                              |
| 2014                   | NU_10x14         | NU              | 60                | 28                  | 0.68           |                                   |
| 2014                   | NU_4x12          | NU              | 21                | 65                  | 0.24           |                                   |
| 2014                   | NU_8x17          | NU              | 56                | 21                  | 0.73           | 0.55                              |
| 2014                   | OBB_11x48        | OBB             | 39                | 73                  | 0.35           |                                   |
| 2014                   | OBB_18x20        | OBB             | 54                | 30                  | 0.64           |                                   |
| 2014                   | OBB_5x16         | OBB             | 48                | 25                  | 0.66           | 0.55                              |
| 2014                   | SKO_18x49        | SKO             | 45                | 36                  | 0.56           |                                   |
| 2014                   | SKO_18x57        | SKO             | 52                | 33                  | 0.61           |                                   |
| 2014                   | SKO_57x58        | SKO             | 49                | 36                  | 0.58           | 0.58                              |
| 2014                   | SP_10x12         | SP              | 55                | 33                  | 0.63           |                                   |
| 2014                   | SP_14x19         | SP              | 19                | 23                  | 0.45           |                                   |
| 2014                   | SP_1x13          | SP              | 22                | 66                  | 0.25           | 0.44                              |
| 2015                   | ECH_3x10         | ECH             | 49                | 24                  | 0.67           |                                   |
| 2015                   | ECH_6x23         | ECH             | 60                | 28                  | 0.68           |                                   |
| 2015                   | ECH_9x14         | ECH             | 53                | 32                  | 0.62           | 0.66                              |
| 2015                   | GOT_13x8         | GOT             | 28                | 71                  | 0.28           |                                   |
| 2015                   | GOT_1x5          | GOT             | 39                | 71                  | 0.35           |                                   |
| 2015                   | GOT_9x6          | GOT             | 34                | 64                  | 0.35           | 0.33                              |
| 2015                   | IBB_35           | IBB             | 76                | 56                  | 0.58           |                                   |
| 2015                   | IBB_39           | IBB             | 117               | 55                  | 0.68           |                                   |
| 2015                   | IBB_41           | IBB             | 123               | 35                  | 0.78           | 0.68                              |
| 2015                   | ISC_59           | ISC             | 103               | 31                  | 0.77           |                                   |
| 2015                   | ISC_61           | ISC             | 121               | 47                  | 0.72           |                                   |
| 2015                   | ISC_70           | ISC             | 124               | 55                  | 0.69           | 0.73                              |
| 2015                   | NST_13x14        | NST             | 76                | 66                  | 0.54           |                                   |
| 2015                   | NST_2x7          | NST             | 86                | 65                  | 0.57           |                                   |
| 2015                   | NST_8x9          | NST             | 92                | 80                  | 0.53           | 0.55                              |
| 2015                   | NU_10x14         | NU              | 36                | 54                  | 0.40           |                                   |
| 2015                   | NU_5x18          | NU              | 30                | 85                  | 0.26           |                                   |
| 2015                   | NU_8x17          | NU              | 57                | 50                  | 0.53           | 0.40                              |
| 2015                   | OBB_11x48        | OBB             | 44                | 50                  | 0.47           |                                   |
| 2015                   | OBB_18x20        | OBB             | 33                | 54                  | 0.38           |                                   |
| 2015                   | OBB_5x16         | OBB             | 46                | 43                  | 0.52           | 0.45                              |
| 2015                   | SKO_18x57        | SKO             | 63                | 111                 | 0.36           |                                   |
| 2015                   | SKO_26x44        | SKO             | 106               | 41                  | 0.72           |                                   |
| 2015                   | SKO_57x58        | SKO             | 43                | 131                 | 0.25           | 0.44                              |
| 2015                   | SP_10x12         | SP              | 55                | 75                  | 0.42           |                                   |
| 2015                   | SP_1x13          | SP              | 44                | 44                  | 0.50           |                                   |
| 2015                   | SP_8x17          | SP              | 43                | 82                  | 0.34           | 0.42                              |

**Table S3.** Infection rates and *S. solidus* size in DE and NO *G. aculeatus*

| Year of the experiment | Fish family | Fish origin | Parasite sibship | Parasite origin | Total fish | Exposed fish | Infected fish | Uninfected fish | Infection rate | Mean weight | Mean PI |
|------------------------|-------------|-------------|------------------|-----------------|------------|--------------|---------------|-----------------|----------------|-------------|---------|
| 2014                   | GPS_16x6    | DE          | ECH_3x10         | ECH             | 20         | 19           | 2             | 17              | 0.11           | 88.3        | 13.53   |
| 2014                   | GPS_16x6    | DE          | GOT_10x12        | GOT             | 20         | 20           | 3             | 17              | 0.15           | 48.53       | 6.8     |
| 2014                   | GPS_16x6    | DE          | NST_8x9          | NST             | 20         | 20           | 9             | 11              | 0.45           | 31.63       | 5.14    |
| 2014                   | GPS_16x6    | DE          | NU_8x17          | NU              | 20         | 20           | 6             | 14              | 0.30           | 75.28       | 11.62   |
| 2014                   | GPS_16x6    | DE          | OBB_11x48        | OBB             | 20         | 19           | 4             | 15              | 0.21           | 42.88       | 6.43    |
| 2014                   | GPS_16x6    | DE          | SKO_57x58        | SKO             | 20         | 20           | 5             | 15              | 0.25           | 102.72      | 15.33   |
| 2014                   | GPS_16x6    | DE          | SP_14x19         | SP              | 18         | 17           | 7             | 10              | 0.41           | 61.27       | 10.97   |
| 2014                   | GPS_24x29   | DE          | ECH_9x14         | ECH             | 20         | 20           | 2             | 18              | 0.10           | 96.4        | 13.15   |
| 2014                   | GPS_24x29   | DE          | GOT_13x8         | GOT             | 20         | 20           | 0             | 20              | 0.00           | na          | na      |
| 2014                   | GPS_24x29   | DE          | NST_13x14        | NST             | 20         | 20           | 4             | 16              | 0.20           | 25.6        | 4.18    |
| 2014                   | GPS_24x29   | DE          | NU_10x14         | NU              | 20         | 20           | 4             | 16              | 0.20           | 80.5        | 15.2    |
| 2014                   | GPS_24x29   | DE          | OBB_18x20        | OBB             | 20         | 20           | 2             | 18              | 0.10           | 18.7        | 3.74    |
| 2014                   | GPS_24x29   | DE          | SKO_18x49        | SKO             | 20         | 20           | 0             | 20              | 0.00           | na          | na      |
| 2014                   | GPS_24x29   | DE          | SP_10x12         | SP              | 20         | 18           | 0             | 18              | 0.00           | na          | na      |
| 2014                   | GPS_5x3     | DE          | ECH_6x23         | ECH             | 20         | 19           | 3             | 16              | 0.16           | 68.57       | 12.34   |
| 2014                   | GPS_5x3     | DE          | GOT_1x5          | GOT             | 20         | 19           | 5             | 14              | 0.26           | 41.5        | 6.75    |
| 2014                   | GPS_5x3     | DE          | NST_2x7          | NST             | 20         | 20           | 4             | 16              | 0.20           | 42.6        | 6.71    |
| 2014                   | GPS_5x3     | DE          | NU_4x12          | NU              | 18         | 17           | 1             | 16              | 0.06           | 94.96       | 13.73   |
| 2014                   | GPS_5x3     | DE          | OBB_5x16         | OBB             | 20         | 19           | 4             | 15              | 0.21           | 23.83       | 4.48    |
| 2014                   | GPS_5x3     | DE          | SKO_18x57        | SKO             | 20         | 20           | 7             | 13              | 0.35           | 98.27       | 14.74   |
| 2014                   | GPS_5x3     | DE          | SP_1x13          | SP              | 20         | 20           | 1             | 19              | 0.05           | 75          | 9.96    |
| 2015                   | GPS_117x111 | DE          | IBB_39           | IBB             | 20         | 19           | 10            | 9               | 0.53           | 89.95       | 11.04   |
| 2015                   | GPS_117x111 | DE          | ISC_70           | ISC             | 20         | 19           | 5             | 14              | 0.26           | 106.74      | 14.19   |
| 2015                   | GPS_117x111 | DE          | NST_8x9          | NST             | 20         | 20           | 8             | 12              | 0.40           | 38.5        | 5.1     |
| 2015                   | GPS_117x111 | DE          | SKO_57x58        | SKO             | 13         | 12           | 3             | 9               | 0.25           | 109.53      | 14.95   |
| 2015                   | GPS_125x105 | DE          | IBB_35           | IBB             | 20         | 20           | 5             | 15              | 0.25           | 75.56       | 15.89   |
| 2015                   | GPS_125x105 | DE          | ISC_59           | ISC             | 20         | 20           | 2             | 18              | 0.10           | 70.95       | 16.47   |
| 2015                   | GPS_125x105 | DE          | NST_2x7          | NST             | 20         | 18           | 2             | 16              | 0.11           | 47.3        | 8.87    |
| 2015                   | GPS_125x105 | DE          | SKO_26x44        | SKO             | 20         | 20           | 4             | 16              | 0.20           | 131.3       | 21.55   |
| 2015                   | GPS_22x4    | DE          | IBB_41           | IBB             | 20         | 20           | 3             | 17              | 0.15           | 87.63       | 13.32   |
| 2015                   | GPS_22x4    | DE          | ISC_61           | ISC             | 20         | 16           | 5             | 11              | 0.31           | 89.34       | 13.8    |
| 2015                   | GPS_22x4    | DE          | NST_13x14        | NST             | 20         | 20           | 10            | 10              | 0.50           | 48.07       | 7.56    |
| 2015                   | GPS_22x4    | DE          | SKO_18x57        | SKO             | 20         | 20           | 7             | 13              | 0.35           | 136.99      | 20.29   |
| 2015                   | SKO_10x6    | NO          | ECH_3x10         | ECH             | 20         | 18           | 4             | 14              | 0.22           | 25.15       | 4.12    |
| 2015                   | SKO_10x6    | NO          | GOT_13x8         | GOT             | 19         | 17           | 4             | 13              | 0.24           | 12.83       | 2.18    |
| 2015                   | SKO_10x6    | NO          | IBB_41           | IBB             | 20         | 17           | 2             | 15              | 0.12           | 46.7        | 7.08    |
| 2015                   | SKO_10x6    | NO          | ISC_61           | ISC             | 20         | 18           | 6             | 12              | 0.33           | 50.93       | 7.59    |
| 2015                   | SKO_10x6    | NO          | NST_13x14        | NST             | 20         | 16           | 4             | 12              | 0.25           | 3.85        | 0.85    |
| 2015                   | SKO_10x6    | NO          | NU_5x18          | NU              | 14         | 14           | 7             | 7               | 0.50           | 59.57       | 9.01    |
| 2015                   | SKO_10x6    | NO          | OBB_18x20        | OBB             | 20         | 17           | 10            | 7               | 0.59           | 6.89        | 1.18    |
| 2015                   | SKO_10x6    | NO          | SKO_18x57        | SKO             | 20         | 14           | 8             | 6               | 0.57           | 69.08       | 10.91   |
| 2015                   | SKO_10x6    | NO          | SP_8x17          | SP              | 20         | 18           | 5             | 13              | 0.28           | 45.18       | 7.43    |
| 2015                   | SKO_11x2    | NO          | ECH_9x14         | ECH             | 20         | 17           | 0             | 17              | 0.00           | na          | na      |
| 2015                   | SKO_11x2    | NO          | GOT_1x5          | GOT             | 20         | 19           | 2             | 17              | 0.11           | 10.3        | 1.71    |
| 2015                   | SKO_11x2    | NO          | IBB_39           | IBB             | 20         | 17           | 2             | 15              | 0.12           | 55.85       | 8.75    |
| 2015                   | SKO_11x2    | NO          | ISC_70           | ISC             | 20         | 14           | 5             | 9               | 0.36           | 45.04       | 6.7     |
| 2015                   | SKO_11x2    | NO          | NST_8x9          | NST             | 20         | 16           | 2             | 14              | 0.13           | 10.95       | 1.75    |
| 2015                   | SKO_11x2    | NO          | NU_8x17          | NU              | 20         | 16           | 6             | 10              | 0.38           | 88.65       | 12.31   |
| 2015                   | SKO_11x2    | NO          | OBB_11x48        | OBB             | 20         | 15           | 1             | 14              | 0.07           | 2.8         | 0.5     |
| 2015                   | SKO_11x2    | NO          | SKO_57x58        | SKO             | 20         | 19           | 2             | 17              | 0.11           | 123         | 13.65   |
| 2015                   | SKO_11x2    | NO          | SP_10x12         | SP              | 20         | 16           | 2             | 14              | 0.13           | 51.8        | 7.16    |
| 2015                   | SKO_4x17    | NO          | ECH_6x23         | ECH             | 20         | 19           | 1             | 18              | 0.05           | 42.9        | 7.28    |
| 2015                   | SKO_4x17    | NO          | GOT_9x6          | GOT             | 20         | 17           | 1             | 16              | 0.06           | 0.6         | 0.11    |
| 2015                   | SKO_4x17    | NO          | IBB_35           | IBB             | 20         | 17           | 3             | 14              | 0.18           | 53.97       | 8.62    |
| 2015                   | SKO_4x17    | NO          | ISC_59           | ISC             | 20         | 10           | 1             | 9               | 0.10           | 89.3        | 13.89   |
| 2015                   | SKO_4x17    | NO          | NST_2x7          | NST             | 20         | 15           | 2             | 13              | 0.13           | 7.2         | 1.22    |
| 2015                   | SKO_4x17    | NO          | NU_10x14         | NU              | 20         | 16           | 5             | 11              | 0.31           | 68.42       | 10.8    |
| 2015                   | SKO_4x17    | NO          | OBB_5x16         | OBB             | 20         | 18           | 1             | 17              | 0.06           | 3.4         | 0.51    |
| 2015                   | SKO_4x17    | NO          | SKO_26x44        | SKO             | 20         | 14           | 4             | 10              | 0.29           | 83.78       | 12.78   |
| 2015                   | SKO_4x17    | NO          | SP_1x13          | SP              | 20         | 16           | 2             | 14              | 0.13           | 34.15       | 5.46    |

**Table S4.** Host and parasite effects and their interaction on infection rates

| <b>Host effect, parasite effect and interaction</b>            |                                            |    |        |         |
|----------------------------------------------------------------|--------------------------------------------|----|--------|---------|
| Data subset                                                    | Explanatory                                | Df | Chisq  | p-value |
| <i>Contrast 1</i><br>(simultaneously infected DE and NO hosts) | <i>S. solidus</i> origin                   | 3  | 0.8817 | 0.82985 |
|                                                                | Host population                            | 1  | 2.2658 | 0.13226 |
|                                                                | <i>S. solidus</i> origin : host population | 3  | 6.4206 | 0.09285 |
| <b>Parasite effect</b>                                         |                                            |    |        |         |
| Data subset                                                    | Explanatory                                | Df | Chisq  | p-value |
| <i>Contrast 2</i> (DE in 2014)                                 | <i>S. solidus</i> origin                   | 6  | 7.1518 | 0.307   |
| <i>Contrast 3</i> (NO in 2015)                                 | <i>S. solidus</i> origin                   | 8  | 21.619 | 0.00567 |
| <b>Differences between the two years of the experiment</b>     |                                            |    |        |         |
| Data subset                                                    | Explanatory                                | Df | Chisq  | p-value |
| DE hosts infected in 2014 and 2015                             | <i>S. solidus</i> origin                   | 1  | 1.1665 | 0.28013 |
|                                                                | Round                                      | 5  | 9.416  | 0.09358 |
|                                                                | <i>S. solidus</i> origin : round           | 3  | 3.4414 | 0.32844 |

Sticklebacks from two different host populations (DE and NO) were exposed to *S. solidus* parasites from nine different locations in three experiments over two consecutive years (2014 and 2015). The infection rates were analyzed as proportional data (accounting for the copepods that were not ingested) with binomial error structure. We tested for differences between the years by using data of hosts that were exposed to the same sibships in the two years of the experiment. The respective generalized linear model (GLM) included 'round' (fish family x parasite sibship combination) and the interaction with *S. solidus* origin as an explanatory. Host and parasite effects were analyzed with GLMMs including 'round' as random effect.

## SI.2 Supplementary information on parasite indices (*contrast 1*)

**Table S5.** The effect of host and parasite population on parasite indices

| Explanatory                                | numDF | denDF | F-value  | p-value  | R <sup>2</sup> |
|--------------------------------------------|-------|-------|----------|----------|----------------|
| Host population                            | 1     | 95    | 23.48201 | < 0.0001 | 0.8934325      |
| <i>S. solidus</i> origin                   | 3     | 95    | 78.93636 | < 0.0001 |                |
| Host population : <i>S. solidus</i> origin | 3     | 95    | 0.99526  | 0.3986   |                |

Sticklebacks were infected with single *S. solidus* parasites from NST, IBB, ISC, or SKO. The linear mixed model (LMM) included 'round', i.e. host and parasite genotype combinations, as random intercept. The R<sup>2</sup> includes the effect of the random term and was calculated according to (Nakagawa and Schielzeth, 2013; Johnson, 2014; Lefcheck, 2016).

**Table S6.** Post hoc testing using manually defined contrast to determine differences between fish populations.

|               | Parasite origin | Estimate | Std. Err | t-value | Pr(> t ) |
|---------------|-----------------|----------|----------|---------|----------|
| DE vs NO fish | IBB             | -5.1459  | 1.0619   | -4.846  | < 0.0001 |
|               | ISC             | -6.5330  | 1.0289   | -6.350  | < 0.0001 |
|               | NST             | -5.9784  | 0.7431   | -8.045  | < 0.0001 |
|               | SKO             | -7.7660  | 1.1629   | -6.678  | < 0.0001 |

**Table S7.** Post hoc testing using manually defined contrast to determine differences between origin of the parasites.

|         | Parasite origins |     | Estimate | Std. Error | t-value | Pr(> t ) |        |
|---------|------------------|-----|----------|------------|---------|----------|--------|
| DE fish | ISC              | vs  | IBB      | 1.6325     | 0.9230  | 1.769    | 0.4925 |
|         | NST              | vs  | IBB      | -5.9838    | 0.7002  | -8.545   | <0.001 |
|         | SKO              | vs  | IBB      | 6.2738     | 1.0076  | 6.227    | <0.001 |
|         | NST              | vs  | ISC      | -7.6163    | 0.8279  | -9.200   | <0.001 |
|         | SKO              | vs  | ISC      | 4.6413     | 1.1015  | 4.214    | <0.001 |
|         | SKO              | vs  | NST      | 12.2576    | 0.9186  | 13.344   | <0.001 |
|         | NO fish          | ISC | vs       | IBB        | 0.2453  | 1.1679   | 0.210  |
| NST     |                  | vs  | IBB      | -6.8163    | 1.0961  | -6.219   | <0.001 |
| SKO     |                  | vs  | IBB      | 3.6537     | 1.2217  | 2.991    | 0.0353 |
| NST     |                  | vs  | ISC      | -7.0617    | 0.9627  | -7.335   | <0.001 |
| SKO     |                  | vs  | ISC      | 3.4083     | 1.1063  | 3.081    | 0.0273 |
| SKO     |                  | vs  | NST      | 10.4700    | 1.0327  | 10.139   | <0.001 |

### SI.3 Supplementary information on host condition and immunological parameters

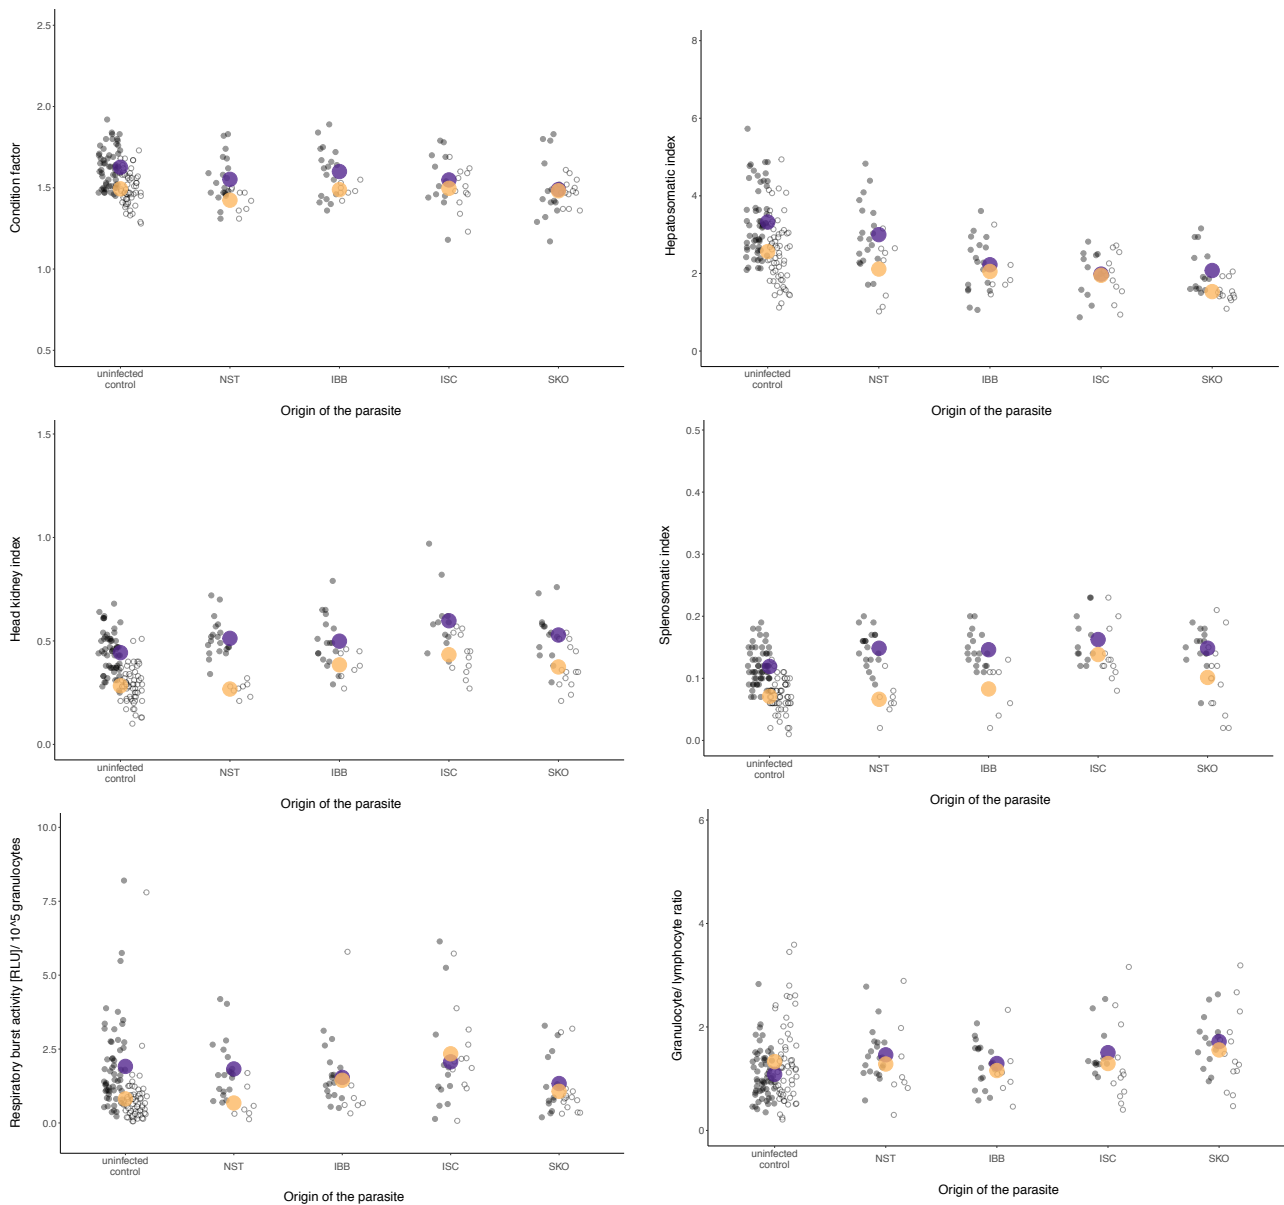

**Figure S1.** Phenotypic differences between NO (orange) and DE (violet) sticklebacks (*contrast 1*). The fish were either sham-exposed or infected with single *S. solidus* parasites from the Baltic (NST: Neustädter Binnenwasser, Germany), the European Inland (IBB: Ibbenbürener Aa, Germany), or the Atlantic region (ISC: Lake Myvatn, Iceland; SKO: Lake Skogseidvatnet, Norway). The parasite sibships, i.e. genotypes, were the same for both host populations. The fish were dissected 55 (+/- 2) DPE.

We determined the overall condition (condition factor, CF, the ratio between the observed weight  $W$  (in g) and the expected weight at a given length  $L$  (in cm):  $CF = 100 * W/L^b$ . The expected weight depends on the exponent  $b$ , which is characteristic for each fish population and was calculated by regression analysis of logarithm-transformed data of the length and the weight of all fish from each experiment, (Frischknecht, 1993)) and estimates of metabolic reserves (hepatosomatic index,  $HSI = 100 * W_L / W$ , with  $W_L$  representing the weight of the liver, (Chellappa et al., 1995)) and immunological activity (splenosomatic index,  $SSI = 100 * W_s / W$ , with  $W_s$  representing the weight of the spleen, (Seppänen et al., 2009); head kidney index, HKI, the weight of the head kidney in relation to body weight). Numbers of granulocytes and lymphocytes in 0.5 mL head kidney leukocyte (HKL) cell suspensions were used to calculate the granulocyte to lymphocyte (G/L) ratio as a proxy for the activity of the innate versus the adaptive immune system. Relative light units (RLUs) in a lucigenin-enhanced chemiluminescence assay quantify the production of reactive oxygen species (ROS) and hence phagocytic capacity of HKL.

Cell suspensions of HKL were prepared by forcing tissue samples through a 40  $\mu\text{m}$  nylon mesh (BD Falcon, USA). The cells were transferred to a 96 deep well plate and rinsed twice in R-90 (90% (v/v) RPMI 1640 in distilled water) at 600  $g$  for 10 min at 4  $^{\circ}\text{C}$ . Total cell numbers were determined by a modified protocol (Scharsack et al., 2004) of the Standard cell dilution assay (Pechhold et al., 1994). Therefore, each sample was supplemented with 2 mg/L propidium iodide (Sigma Aldrich) and  $3 \times 10^4$  green fluorescent reference particles (4  $\mu\text{m}$ , Polyscience, USA). FSC/SSC characteristics were measured in linear mode for one minute or for up to 10,000 events using a Becton Dickinson FACS Calibur and BD CellQuest™ pro software (Version 6.0). Propidium iodide positive (i.e. dead) cells and cellular debris (low FSC characteristics) were excluded from further analyses. Granulocytes and leukocytes were identified according to their FSC/SSC profiles. The numbers of viable granulocytes and lymphocytes in 0.5 mL were used to calculate the granulocyte to lymphocyte ratio (G/L ratio) (Kurtz et al., 2004). A lucigenin-enhanced chemiluminescence (CL) assay (Scott and Klesius, 1981; Kurtz et al., 2004) was used for functional analysis of innate immune activity. The CL assay measures the phagocytic capacity of HKL by quantifying the respiratory burst reaction in relative luminescence units (RLUs). Briefly,  $10^5$  live cells per sample were supplemented with



50 µg lucigenin (Sigma M 8010) and incubated at 18 °C and 2% CO<sub>2</sub> for 30 min. Zymosan (Sigma Z 4250) was added at a final concentration of 0.75 µg/µL to stimulate the production of reactive oxygen species (ROS). Chemiluminescence was measured every 3 min for 3.5 hours (Berthold Technologies luminometer) and the area under the kinetic curve (calculated with Win Glow 2000 professional software) was used for analyses. The RLU was standardized by division by the mean RLU of the negative controls (wells containing buffer without head kidney cells) for each day and by division by the number of vital granulocytes of the respective sample. Unfortunately, we could not obtain enough cells from every fish (data was missing from 13 samples) and thus analyzed production of reactive oxygen species of a total of 1430 different samples. Controls (medium without cells) were missing for one round in 2015. Values for those controls were inferred from data from empty wells in relation to controls.

Testing these condition and immunity related indices in each experiment, DE sticklebacks (*contrast 2*; Figure S2) showed significantly elevated immune parameters if they were infected with Pacific *S. solidus*: the head kidneys were larger (LMM;  $p < 0.001$ ), the G/L ratio was significantly higher in comparison to all but SKO-infected fish (LMM;  $p < 0.001$ ) and the head kidney's potential to produce reactive oxygen species was higher in comparison to controls (LMM;  $p < 0.001$ ) and SKO-parasite infected fish (LMM;  $p = 0.005$ ). The fish had significantly lower body condition than their respective controls if infected with Spanish parasites (LMM,  $p < 0.001$ ) (Figure S2). In *contrast 1*, DE fish had significantly lower body condition than respective controls if infected with SKO-parasites (LMM;  $p = 0.003$ ). The Hepatosomatic index was significantly smaller when fish were infected with fast growing *S. solidus* from IBB, ISC or SKO (LMMs;  $p < 0.001$ ). Compared to controls, spleens were enlarged if fish were infected with parasites from ISC (LMM;  $p < 0.001$ ), NST (LMM;  $p < 0.001$ ) or SKO (LMM;  $p = 0.003$ ). Head kidneys were larger in ISC-infected fish than in control fish (LMM;  $p < 0.001$ ) and the G/L ratio was significantly higher in SKO-infected fish than in control fish (LMM;  $p < 0.001$ ) (Figure S3). Relative to the control, NO sticklebacks had significantly lower Hepatosomatic indices when they were infected with sympatric (SKO-) *S. solidus* parasites (LMM;  $p < 0.001$ ). The Splenosomatic index was higher in ISC-parasite infected fish in comparison to controls and NST-parasite infected fish (LMMs; each  $p < 0.001$ ). Head kidney related immune parameters did not differ between infected and uninfected NO sticklebacks (Figure S4).

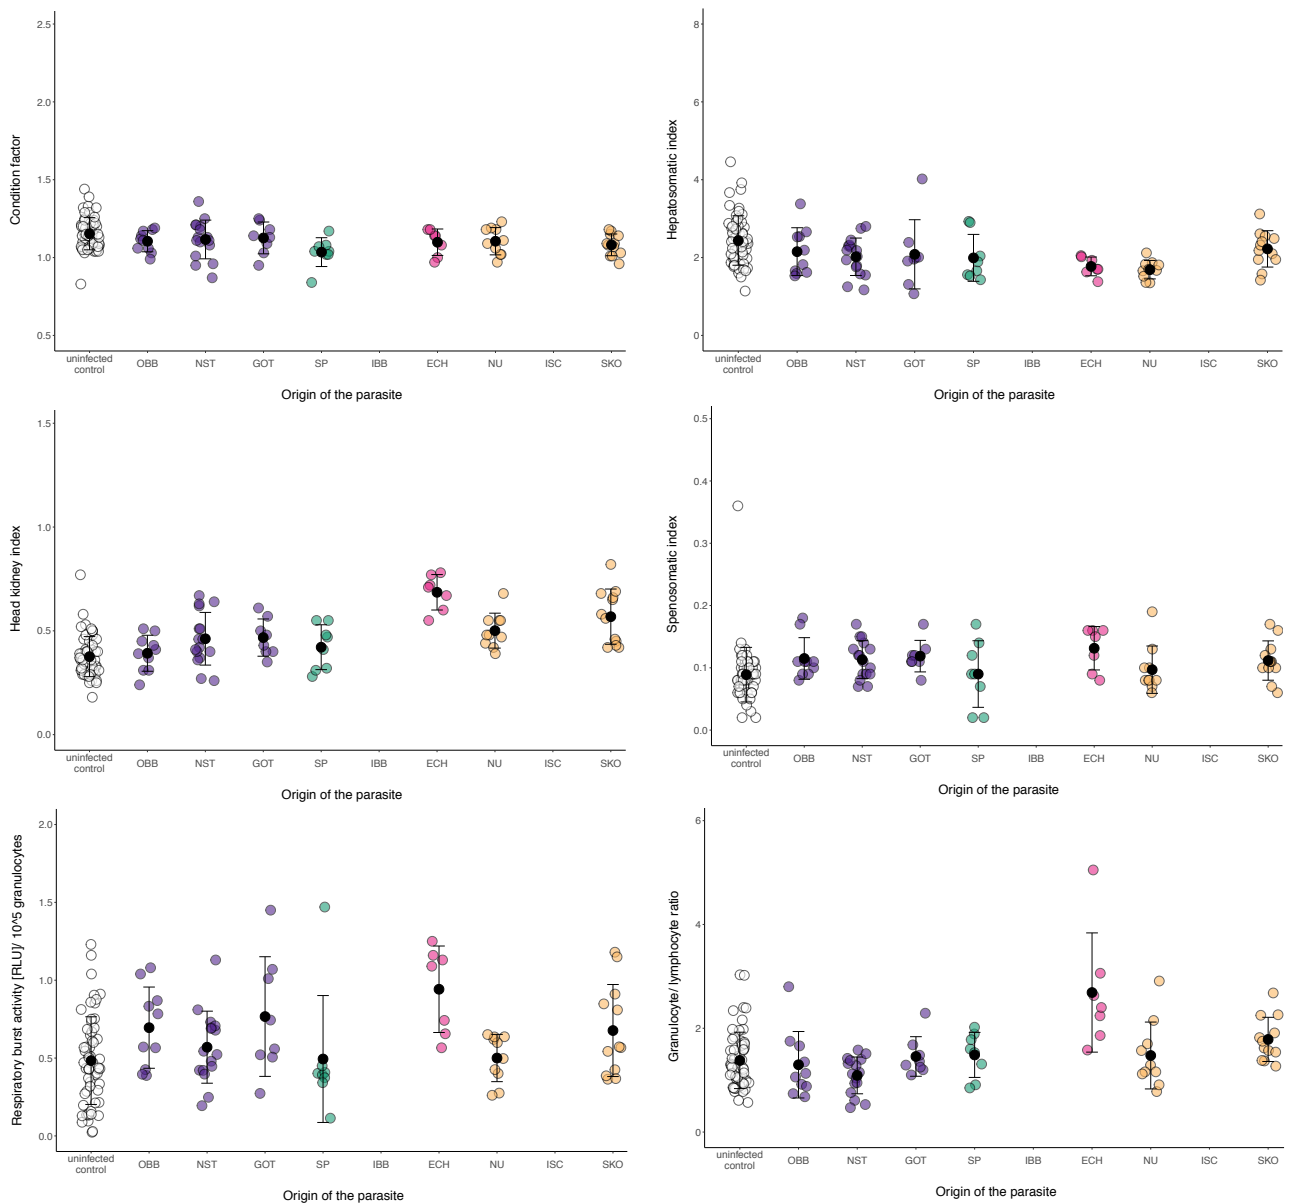

**Figure S2.** Phenotypic differences between sham-exposed and *S. solidus* infected DE sticklebacks (*contrast 2*).

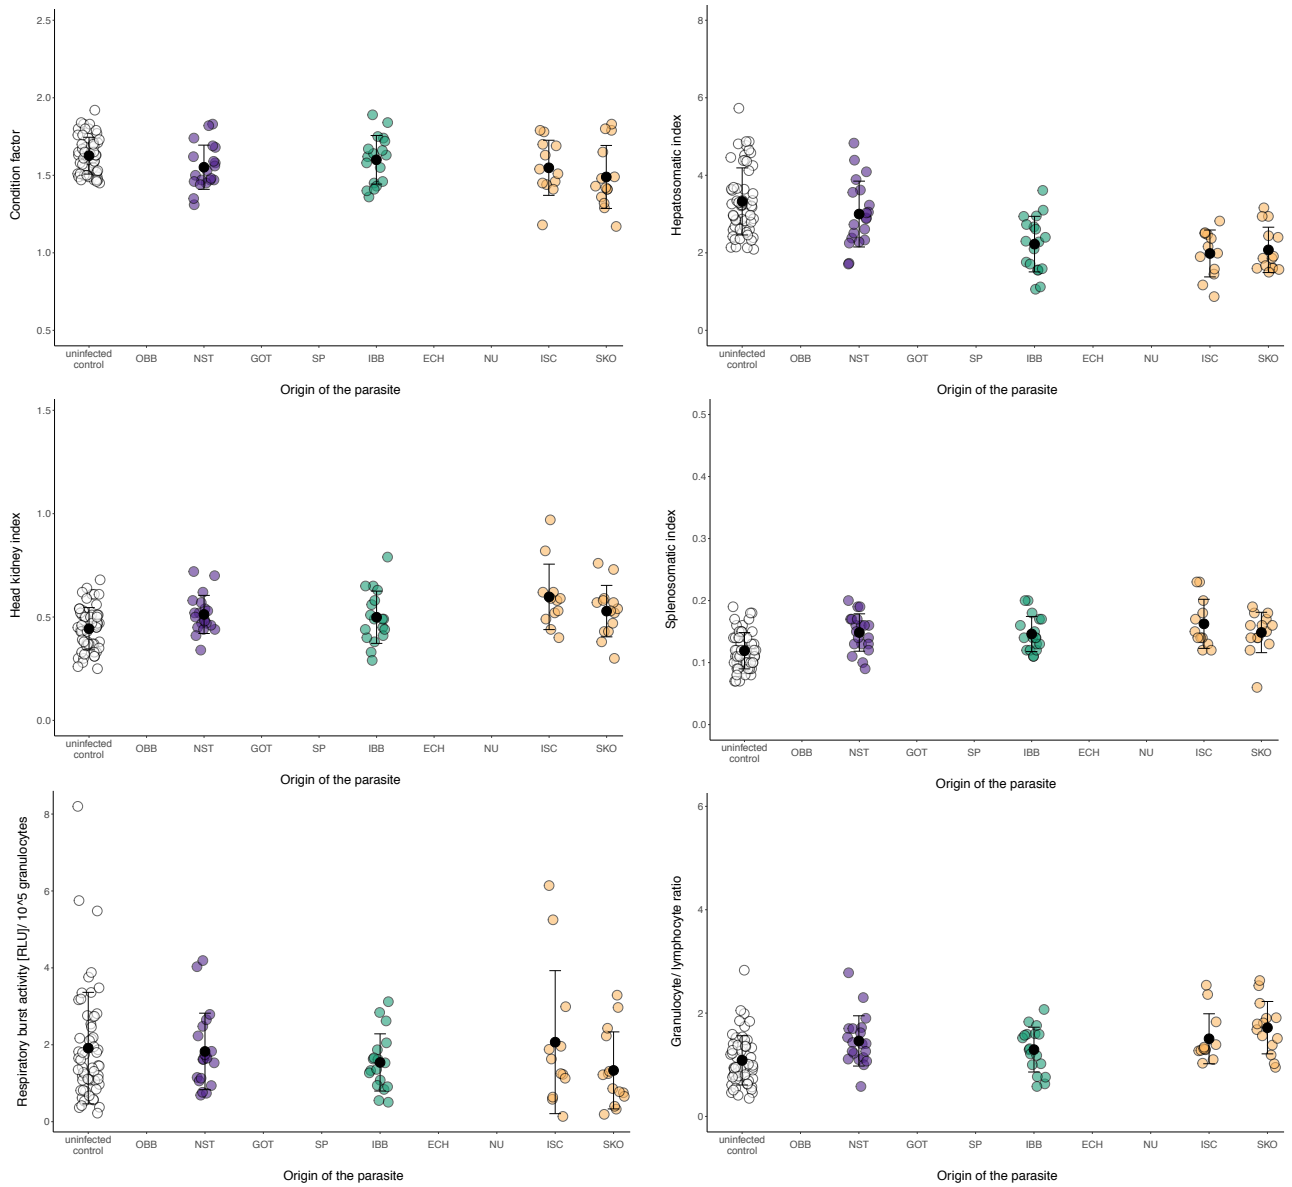

**Figure S3.** Phenotypic differences between sham-exposed and *S. solidus* infected DE sticklebacks (DE in *contrast 1*).

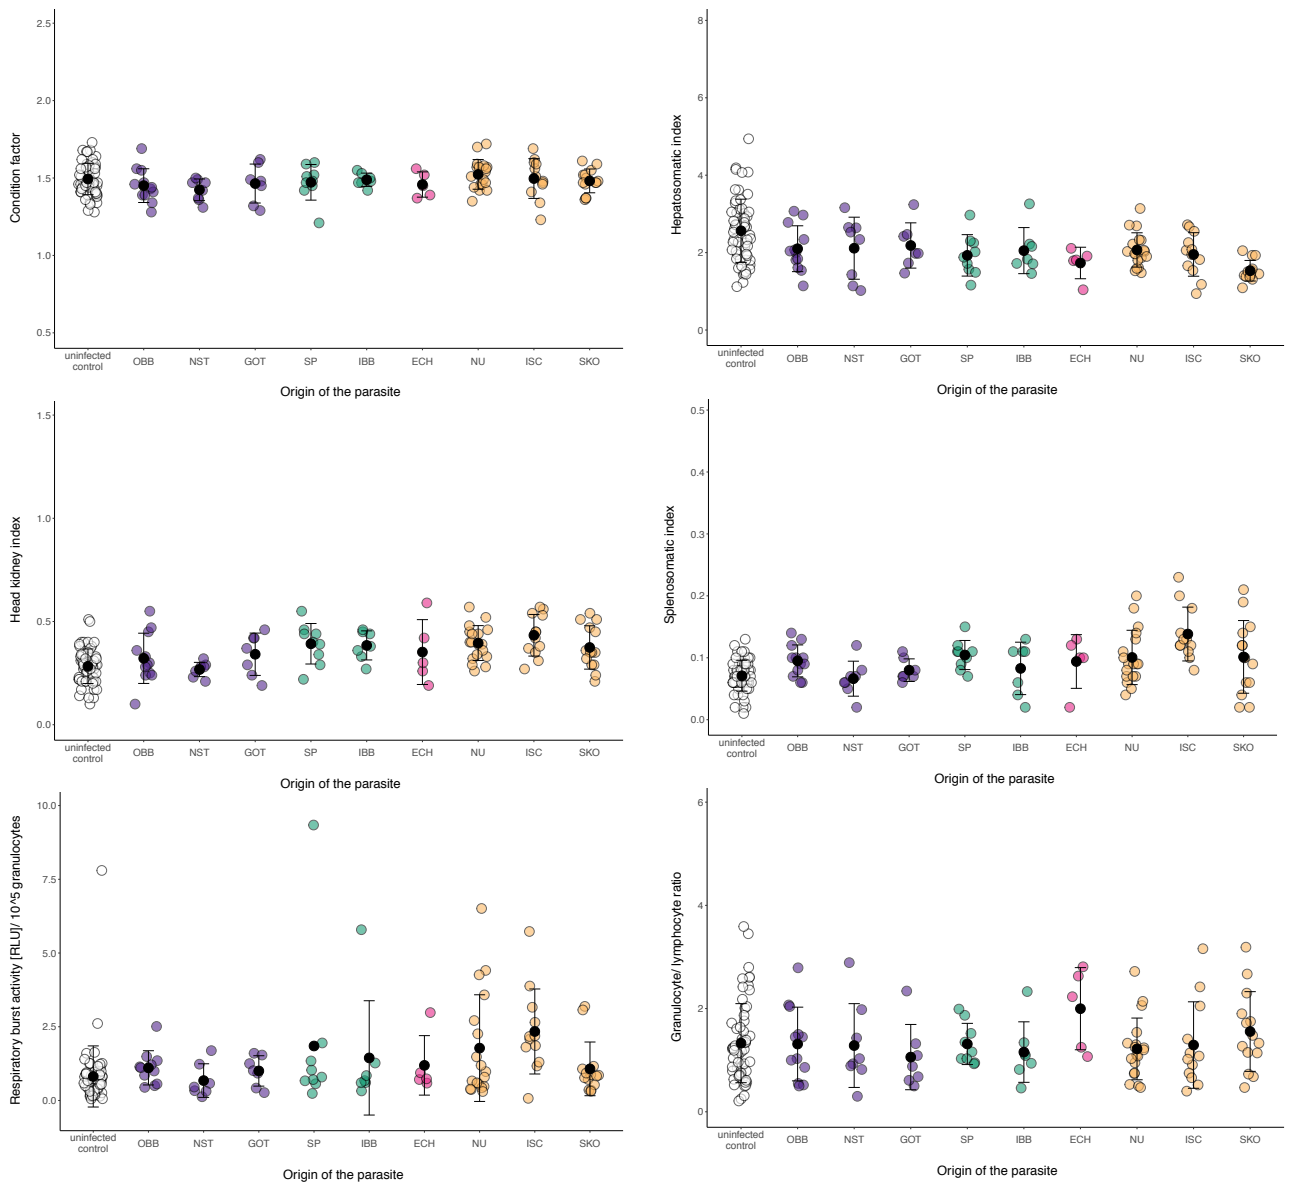

**Figure S4.** Phenotypic differences between sham-exposed and *S. solidus* infected NO sticklebacks (*contrast 3*).

## SI.4 Supplementary information on host immune gene expression (*contrast 1*)

### SI.4.1 Stickleback immune gene expression differences between populations

**Table S8.** Differentially expressed immune genes of sham-exposed DE and NO sticklebacks (*contrast 1*)

| PERMANOVA results                    | Df    | SumsOfSqs | F.Model   | Pr(<F)             | R2         |
|--------------------------------------|-------|-----------|-----------|--------------------|------------|
| all genes                            | 1     | 10.226    | 4.4637    | 0.0012             | 0.08704    |
| <i>innate</i>                        | 1     | 4.249     | 3.3172    | 0.009699           | 0.06595    |
| ANOVA results                        | numDF | denDF     | F-value   | p-value            | pseudo R2  |
| <i>marco</i>                         | 1     | 44        | 1.034201  | 0.3147             | 0.202792   |
| <i>mst1ra</i>                        | 1     | 44        | 0.988256  | 0.3256             | 0.1088608  |
| <i>mif1</i>                          | 1     | 44        | 0.003197  | 0.9552             | 0.2315523  |
| <i>il-1<math>\beta</math></i>        | 1     | 44        | 0.202999  | 0.6545             | 0.04337287 |
| <i>tnfr1</i>                         | 1     | 44        | 0.7095827 | 0.4041             | 0.175504   |
| <i>saal1</i>                         | 1     | 44        | 0.7411738 | 0.3940             | 0.1033716  |
| <i>tlr2</i>                          | 1     | 44        | 0.411762  | 0.5244             | 0.1649114  |
| <i>csf3r</i>                         | 1     | 44        | 7.288786  | 0.0098             | 0.4030412  |
| <b><i>p22<sup>phox</sup></i></b>     | 1     | 44        | 19.317685 | <b>0.0001</b>      | 0.4384317  |
| <i>nkef-b</i>                        | 1     | 44        | 1.349697  | 0.2516             | 0.05610734 |
| <b><i>sla1</i></b>                   | 1     | 44        | 9.537701  | <b>0.0035</b>      | 0.3700301  |
| <i>cd97</i>                          | 1     | 44        | 3.454024  | 0.0698             |            |
| <i>adaptive</i>                      | 1     | 3.9233    | 6.7610    | 0.0018             | 0.12663    |
| <i>stat4</i>                         | 1     | 44        | 3.703683  | 0.0608             | 0.07364854 |
| <i>stat6</i>                         | 1     | 44        | 5.313142  | 0.0259             | 0.319497   |
| <b><i>igm</i></b>                    | 1     | 44        | 11.776301 | <b>0.0013</b>      | 0.3308283  |
| <i>cd83</i>                          | 1     | 44        | 0.071832  | 0.7899             | 0.03668696 |
| <i>foxp3</i>                         | 1     | 44        | 0.7612114 | 0.3877             | 0.2346003  |
| <i>tgf-<math>\beta</math></i>        | 1     | 44        | 0.3527227 | 0.5556             | 0.127027   |
| <b><i>tcr-<math>\beta</math></i></b> | 1     | 44        | 54.47217  | <b>&lt; 0.0001</b> | 0.5979209  |
| <i>il16</i>                          | 1     | 44        | 2.9887492 | 0.0909             | 0.2852176  |
| <i>mhcII</i>                         | 1     | 44        | 6.409371  | 0.0150             | 0.6314256  |
| <i>complement</i>                    | 1     | 2.0539    | 4.7784    | 0.0039             | 0.09302    |
| <i>cfb</i>                           | 1     | 44        | 5.792049  | 0.0204             | 0.3207292  |
| <b><i>c7</i></b>                     | 1     | 44        | 20.639223 | <b>&lt; 0.0001</b> | 0.3323971  |
| <i>c9</i>                            | 1     | 44        | 0.8890409 | 0.3509             | 0.1934673  |

All models are based on log<sub>10</sub>-transformed calibrated normalized relative quantities (CNRQ values) and include the weight of the fish as covariate to account for size related effects. Non-parametric permutational multivariate analyses of variance (PERMANOVA) were calculated on Euclidian distances and 10,000 permutations; permutations were constrained within 'round'. If results from multivariate statistics remained significant after FDR correction, single genes were analyzed with linear mixed models (LMMs) and analyses of variance (ANOVAs). Conditional pseudo R<sup>2</sup> values (Nakagawa and Schielzeth, 2013; Johnson, 2014) were calculated with the function `sem.model.fits()` from *piecewiseSEM* (Lefcheck, 2016). Differentially expressed genes are marked in bold letters if significant after FDR correction.

**Table S9.** Differentially expressed immune genes of ISC-infected DE and NO sticklebacks (*contrast 1*)

| PERMANOVA results                    | Df                                   | SumsOfSqs | F.Model   | Pr(<F)        | R2        |
|--------------------------------------|--------------------------------------|-----------|-----------|---------------|-----------|
| all genes                            | 1                                    | 6.123     | 2.8019    | 0.015798      | 0.10076   |
| <i>innate</i>                        | 1                                    | 4.661     | 3.5770    | 0.0044        | 0.12548   |
| ANOVA results                        | numDF                                | denDF     | F-value   | p-value       | pseudo R2 |
| <i>marco</i>                         | 1                                    | 18        | 0.8257869 | 0.3755        | 0.2335003 |
| <i>mst1ra</i>                        | 1                                    | 18        | 1.891570  | 0.1859        | 0.4391818 |
| <i>mif1</i>                          | 1                                    | 18        | 0.1941722 | 0.6647        | 0.2549664 |
| <b><i>il-1<math>\beta</math></i></b> | 1                                    | 18        | 19.989167 | <b>0.0003</b> | 0.4332452 |
| <i>tnfr1</i>                         | 1                                    | 18        | 0.222879  | 0.6425        | 0.3809059 |
| <i>saal1</i>                         | 1                                    | 18        | 0.003260  | 0.9551        | 0.5787717 |
| <i>tlr2</i>                          | 1                                    | 18        | 0.032950  | 0.8580        | 0.267587  |
| <i>csf3r</i>                         | 1                                    | 18        | 4.140233  | 0.0569        | 0.1009758 |
| <i>p22<sup>phox</sup></i>            | 1                                    | 18        | 0.284175  | 0.6005        | 0.3422705 |
| <i>nkef-b</i>                        | 1                                    | 18        | 3.658218  | 0.0718        | 0.3553208 |
| <i>sla1</i>                          | 1                                    | 18        | 0.000222  | 0.9883        | 0.3292233 |
| <i>cd97</i>                          | 1                                    | 18        | 0.195377  | 0.6637        | 0.2935738 |
| <i>adaptive</i>                      | not significant after FDR correction |           |           |               |           |
| <i>complement</i>                    | not significant after FDR correction |           |           |               |           |

Sticklebacks were infected with single *S. solidus* plerocercoids from an Icelandic (ISC) population. All models are based on log<sub>10</sub>-transformed calibrated normalized relative quantities (CNRQ values) and include the weight of the fish as covariate to account for size related effects. Non-parametric permutational multivariate analyses of variance (PERMANOVA) were calculated on Euclidian distances and 10,000 permutations; permutations were constrained within 'round'. If results from multivariate statistics remained significant after FDR correction, single genes were analyzed with linear mixed models (LMMs) and analyses of variance (ANOVAs). Conditional pseudo R<sup>2</sup> values (Nakagawa and Schielzeth, 2013; Johnson, 2014) were calculated with the function `sem.model.fits()` from the R package `piecewiseSEM` (Lefcheck, 2016). Differentially expressed genes are marked in bold letters if significant after FDR correction.

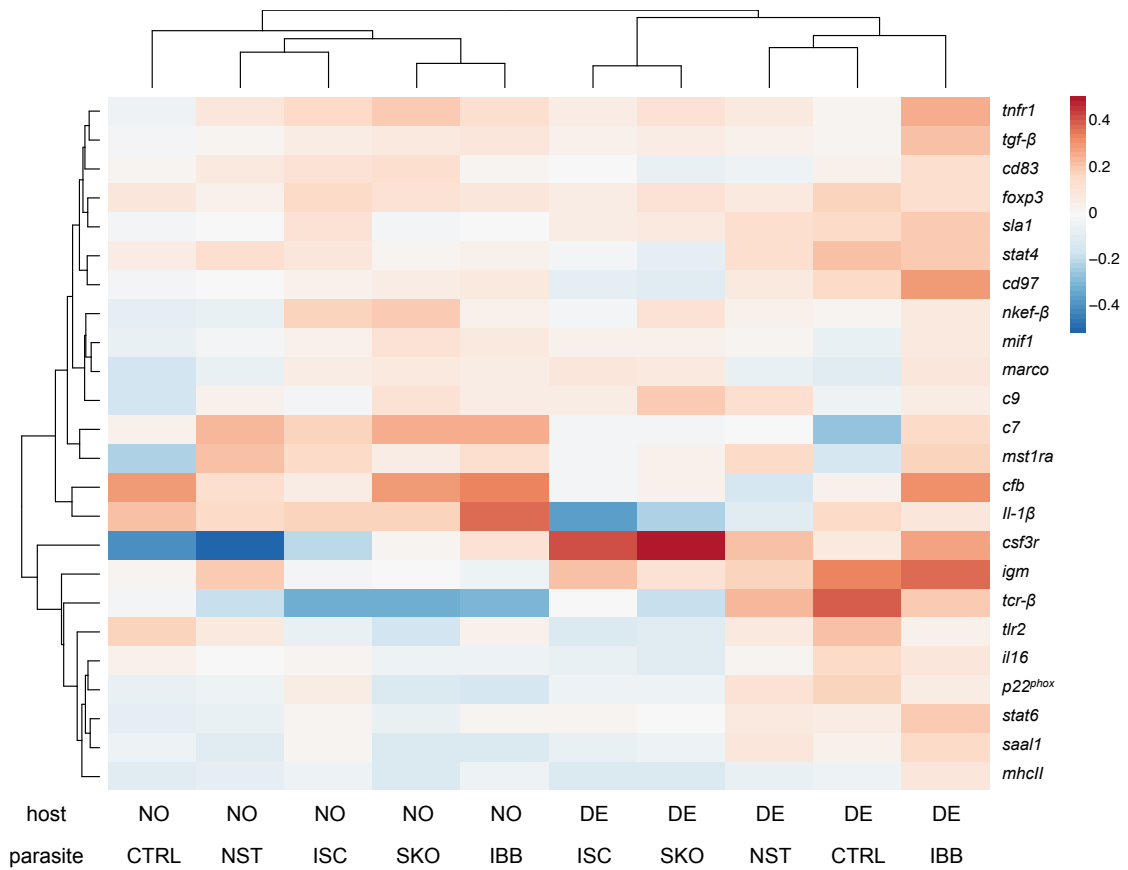

**Figure S6.** Heatmap showing average gene expression values in spleen samples from sham-exposed (CTRL) and *S. solidus* infected DE and NO sticklebacks. Calibrated normalized relative quantities (CNRQ) were log<sub>10</sub>-transformed. The heatmap (function `aheatmap()` from *NMF*) was based on Euclidian distances; rows and columns were clustered according to similarity.

## SI.5 Supplementary information for *contrast 2* and *contrast 3*

**Table S10.** The effect of *S. solidus* origin on parasite indices in DE fish (*contrast 2*)

| Explanatory              |    | R <sup>2</sup> | numDF    | denDF      | F-value  | p-value  |
|--------------------------|----|----------------|----------|------------|----------|----------|
| <i>S. solidus</i> origin |    | 0.7841811      | 6        | 62         | 42.39099 | < 0.0001 |
|                          |    |                | Estimate | Std. Error | z-value  | Pr(> z ) |
| GOT                      | vs | ECH            | -6.1425  | 1.0848     | -5.663   | <0.001   |
| NST                      | vs | ECH            | -7.5550  | 0.9467     | -7.980   | <0.001   |
| NU                       | vs | ECH            | 0.1340   | 1.0296     | 0.130    | 1.00000  |
| OBB                      | vs | ECH            | -7.8000  | 1.0296     | -7.576   | <0.001   |
| SKO                      | vs | ECH            | 2.0792   | 0.9936     | 2.093    | 0.35358  |
| SP                       | vs | ECH            | -2.0675  | 1.0812     | -1.912   | 0.46838  |
| NST                      | vs | GOT            | -1.4125  | 0.9046     | -1.561   | 0.70422  |
| NU                       | vs | GOT            | 6.2765   | 0.9910     | 6.334    | <0.001   |
| OBB                      | vs | GOT            | -1.6575  | 0.9910     | -1.673   | 0.63143  |
| SKO                      | vs | GOT            | 8.2217   | 0.9536     | 8.622    | <0.001   |
| SP                       | vs | GOT            | 4.0750   | 1.0446     | 3.901    | 0.00185  |
| NU                       | vs | NST            | 7.6890   | 0.8422     | 9.130    | <0.001   |
| OBB                      | vs | NST            | -0.2450  | 0.8422     | -0.291   | 0.99995  |
| SKO                      | vs | NST            | 9.6342   | 0.7978     | 12.076   | <0.001   |
| SP                       | vs | NST            | 5.4875   | 0.9046     | 6.066    | <0.001   |
| OBB                      | vs | NU             | -7.9340  | 0.9343     | -8.492   | <0.001   |
| SKO                      | vs | NU             | 1.9452   | 0.8945     | 2.175    | 0.30647  |
| SP                       | vs | NU             | -2.2015  | 0.9910     | -2.222   | 0.28062  |
| SKO                      | vs | OBB            | 9.8792   | 0.8945     | 11.044   | <0.001   |
| SP                       | vs | OBB            | 5.7325   | 0.9910     | 5.785    | <0.001   |
| SP                       | vs | SKO            | -4.1467  | 0.9536     | -4.349   | < 0.001  |

Sticklebacks were infected with single *S. solidus* from OBB, NST, GOT, SP, ECH, NU or SKO. The linear mixed model (LMM) included 'round', i.e. host and parasite genotype combinations, as random intercept. The R<sup>2</sup> includes the effect of the random term and was calculated according to (Nakagawa and Schielzeth, 2013; Johnson, 2014; Lefcheck, 2016). Post hoc tests are based on Tukey's all pair comparisons.

**Table S11.** The effect of *S. solidus* origin on parasite indices in DE fish (*in contrast 1*)

| Explanatory              |    | R <sup>2</sup> | numDF    | denDF      | F-value  | p-value  |
|--------------------------|----|----------------|----------|------------|----------|----------|
| <i>S. solidus</i> origin |    | 0.8037465      | 3        | 58         | 68.63429 | < 0.0001 |
|                          |    |                | Estimate | Std. Error | z-value  | Pr(> z ) |
| ISC                      | vs | IBB            | 1.5266   | 0.9236     | 1.653    | 0.348    |
| NST                      | vs | IBB            | -6.0916  | 0.8223     | -7.408   | <0.001   |
| SKO                      | vs | IBB            | 5.9563   | 0.9007     | 6.613    | <0.001   |
| NST                      | vs | ISC            | -7.6181  | 0.8934     | -8.527   | <0.001   |
| SKO                      | vs | ISC            | 4.4297   | 0.9692     | 4.571    | <0.001   |
| SKO                      | vs | NST            | 12.0478  | 0.8638     | 13.947   | <0.001   |

Sticklebacks were infected with single *S. solidus* from NST, IBB, ISC, or SKO. The linear mixed model (LMM) included 'round', i.e. host and parasite genotype combinations, as random intercept. The R<sup>2</sup> includes the effect of the random term and was calculated according to (Nakagawa and Schielzeth, 2013; Johnson, 2014; Lefcheck, 2016). Post hoc tests are based on Tukey's all pair comparisons.



**Table S12.** The effect of *S. solidus* origin on parasite indices in NO sticklebacks (*contrast 3*)

| Explanatory              |    |     | R <sup>2</sup> | numDF      | denDF   | F-value  | p-value  |
|--------------------------|----|-----|----------------|------------|---------|----------|----------|
| <i>S. solidus</i> origin |    |     | 0.6242631      | 8          | 81      | 61.08925 | < 0.0001 |
|                          |    |     | Estimate       | Std. Error | z-value | Pr(> z ) |          |
| GOT                      | vs | ECH | -2.99800       | 1.31129    | -2.286  | 0.30948  |          |
| IBB                      | vs | ECH | 3.46771        | 1.32980    | 2.608   | 0.15671  |          |
| ISC                      | vs | ECH | 2.99283        | 1.38830    | 2.156   | 0.39017  |          |
| NST                      | vs | ECH | -3.58425       | 1.23234    | -2.908  | 0.07195  |          |
| NU                       | vs | ECH | 5.85811        | 1.41111    | 4.151   | <0.001   |          |
| OBB                      | vs | ECH | -3.67717       | 1.22033    | -3.013  | 0.05374  |          |
| SKO                      | vs | ECH | 7.08414        | 1.46836    | 4.825   | <0.001   |          |
| SP                       | vs | ECH | 2.18311        | 1.67868    | 1.300   | 0.91545  |          |
| IBB                      | vs | GOT | 6.46571        | 0.77373    | 8.357   | <0.001   |          |
| ISC                      | vs | GOT | 5.99083        | 0.87043    | 6.883   | <0.001   |          |
| NST                      | vs | GOT | -0.58625       | 0.59072    | -0.992  | 0.98271  |          |
| NU                       | vs | GOT | 8.85611        | 0.90637    | 9.771   | <0.001   |          |
| OBB                      | vs | GOT | -0.67917       | 0.56523    | -1.202  | 0.94534  |          |
| SKO                      | vs | GOT | 10.08214       | 0.99316    | 10.152  | <0.001   |          |
| SP                       | vs | GOT | 5.18111        | 1.28384    | 4.036   | 0.00138  |          |
| ISC                      | vs | IBB | -0.47488       | 0.89808    | -0.529  | 0.99979  |          |
| NST                      | vs | IBB | -7.05196       | 0.63075    | -11.180 | <0.001   |          |
| NU                       | vs | IBB | 2.39040        | 0.93296    | 2.562   | 0.17371  |          |
| OBB                      | vs | IBB | -7.14488       | 0.60694    | -11.772 | < 0.001  |          |
| SKO                      | vs | IBB | 3.61643        | 1.01748    | 3.554   | 0.00908  |          |
| SP                       | vs | IBB | -1.28460       | 1.30274    | -0.986  | 0.98338  |          |
| NST                      | vs | ISC | -6.57708       | 0.74621    | -8.814  | <0.001   |          |
| NU                       | vs | ISC | 2.86528        | 1.01460    | 2.824   | 0.09069  |          |
| OBB                      | vs | ISC | -6.67000       | 0.72620    | -9.185  | <0.001   |          |
| SKO                      | vs | ISC | 4.09131        | 1.09282    | 3.744   | 0.00466  |          |
| SP                       | vs | ISC | -0.80972       | 1.36240    | -0.594  | 0.99951  |          |
| NU                       | vs | NST | 9.44236        | 0.78784    | 11.985  | <0.001   |          |
| OBB                      | vs | NST | -0.09292       | 0.34448    | -0.270  | 1.00000  |          |
| SKO                      | vs | NST | 10.66839       | 0.88631    | 12.037  | <0.001   |          |
| SP                       | vs | NST | 5.76736        | 1.20309    | 4.794   | <0.001   |          |
| OBB                      | vs | NU  | -9.53528       | 0.76892    | -12.401 | <0.001   |          |
| SKO                      | vs | NU  | 1.22603        | 1.12166    | 1.093   | 0.96852  |          |
| SP                       | vs | NU  | -3.67500       | 1.38564    | -2.652  | 0.14060  |          |
| SKO                      | vs | OBB | 10.76131       | 0.86953    | 12.376  | <0.001   |          |
| SP                       | vs | OBB | 5.86028        | 1.19078    | 4.921   | <0.001   |          |
| SP                       | vs | SKO | -4.90103       | 1.44390    | -3.394  | 0.01638  |          |

Sticklebacks were either sham-exposed or infected with single *S. solidus* from OBB, NST, GOT, SP, IBB, ECH, NU, ISC or SKO. The linear mixed model (LMM) included 'round', i.e. host and parasite genotype combinations, as random intercept. The R<sup>2</sup> was calculated according to (Nakagawa and Schielzeth, 2013; Johnson, 2014; Lefcheck, 2016). Post hoc tests are based on Tukey's all pair comparisons.

### SI.5.1 Stickleback immune gene expression according to clustered localities of parasites

**Table S13.** The effect of parasite origin on immune gene expression in *S. solidus* infected DE sticklebacks (*contrast 2*: Pacific versus Baltic parasites)

| PERMANOVA results             | Df    | SumsOfSqs | F.Model   | Pr(<F)             | R2         |
|-------------------------------|-------|-----------|-----------|--------------------|------------|
| all genes                     | 1     | 11.612    | 4.7401    | 0.0047             | 0.13047    |
| <i>innate</i>                 | 1     | 4.442     | 3.8777    | 0.0183             | 0.10833    |
| ANOVA results                 | numDF | denDF     | F-value   | p-value            | pseudo R2  |
| <i>marco</i>                  | 1     | 29        | 0.6705910 | 0.4195             | 0.1577212  |
| <i>mst1ra</i>                 | 1     | 29        | 0.7120762 | 0.4057             | 0.2422407  |
| <b><i>mif1</i></b>            | 1     | 29        | 24.383022 | <b>&lt; 0.0001</b> | 0.4261418  |
| <i>il-1<math>\beta</math></i> | 1     | 29        | 2.646215  | 0.1146             | 0.2497382  |
| <b><i>tnfr1</i></b>           | 1     | 29        | 19.531804 | <b>0.0001</b>      | 0.1943971  |
| <i>saal1</i>                  | 1     | 29        | 0.6674974 | 0.4206             | 0.05301745 |
| <i>tlr2</i>                   | 1     | 29        | 0.9491798 | 0.3380             | 0.3058376  |
| <i>csf3r</i>                  | 1     | 29        | 8.230615  | 0.0076             | 0.5995144  |
| <i>p22<sup>phox</sup></i>     | 1     | 29        | 0.3811838 | 0.5418             | 0.1390658  |
| <i>nkef-b</i>                 | 1     | 29        | 2.782856  | 0.1060             | 0.2846311  |
| <i>sla1</i>                   | 1     | 29        | 5.547274  | 0.0255             | 0.2100529  |
| <i>cd97</i>                   | 1     | 29        | 5.671517  | 0.0240             | 0.1500293  |
| <i>adaptive</i>               | 1     | 3.5866    | 4.1608    | 0.0126             | 0.11695    |
| <i>stat4</i>                  | 1     | 29        | 0.1462244 | 0.7050             | 0.08385778 |
| <i>stat6</i>                  | 1     | 29        | 0.9020573 | 0.3501             | 0.04451725 |
| <i>igm</i>                    | 1     | 29        | 0.0193593 | 0.8903             | 0.4507765  |
| <i>cd83</i>                   | 1     | 29        | 1.8584893 | 0.1833             | 0.2673836  |
| <i>foxp3</i>                  | 1     | 29        | 6.688682  | 0.0150             | 0.2362648  |
| <i>tgf-<math>\beta</math></i> | 1     | 29        | 2.9102652 | 0.0987             | 0.2368642  |
| <i>tcg-<math>\beta</math></i> | 1     | 29        | 0.273943  | 0.6047             | 0.02215725 |
| <i>il16</i>                   | 1     | 29        | 4.212606  | 0.0492             | 0.2792412  |
| <i>mhcII</i>                  | 1     | 29        | 7.260669  | 0.0116             | 0.6589304  |
| <i>complement</i>             | 1     | 3.5827    | 8.1042    | 0.0014             | 0.20684    |
| <i>cfb</i>                    | 1     | 29        | 6.734624  | 0.0147             | 0.1718487  |
| <i>c7</i>                     | 1     | 29        | 0.754282  | 0.3923             | 0.0116967  |
| <b><i>c9</i></b>              | 1     | 29        | 10.791768 | <b>0.0027</b>      | 0.347015   |

DE sticklebacks were infected with single *S. solidus* from the Pacific (ECH) or the Baltic region (OBB, NST, GOT). All models are based on log<sub>10</sub>-transformed calibrated normalized relative quantities (CNRQ values) and include the weight of the fish as covariate to account for size related effects. Non-parametric permutational multivariate analyses of variance (PERMANOVA) were calculated on Euclidian distances and 10,000 permutations; permutations were constrained within 'round'. If results from multivariate statistics remained significant after FDR correction, single genes were analyzed with linear mixed models (LMMs) and analyses of variance (ANOVAs). Conditional pseudo R<sup>2</sup> values (Nakagawa and Schielzeth, 2013; Johnson, 2014) were calculated with the R package piecewiseSEM (Lefcheck, 2016). Differentially expressed genes are marked in bold letters if significant after FDR correction.

**Table S14.** The effect of parasite origin on immune gene expression in *S. solidus* infected DE sticklebacks (*contrast 2*: Pacific versus Atlantic parasites)

| PERMANOVA results   | Df              | SumsOfSqs | F.Model   | Pr(<F)        | R2         |
|---------------------|-----------------|-----------|-----------|---------------|------------|
| all genes           | 1               | 7.483     | 3.7018    | 0.0040        | 0.13122    |
| <i>innate</i>       | not significant |           |           |               |            |
| <i>adaptive</i>     | 1               | 4.3787    | 5.8377    | 0.0002        | 0.19318    |
| ANOVA results       | numDF           | denDF     | F-value   | p-value       | pseudo R2  |
| <i>stat4</i>        | 1               | 22        | 3.183325  | 0.0882        | 0.2131196  |
| <i>stat6</i>        | 1               | 22        | 0.8429660 | 0.3685        | 0.3147911  |
| <i>igm</i>          | 1               | 22        | 0.173993  | 0.6806        | 0.2110768  |
| <i>cd83</i>         | 1               | 22        | 0.8383639 | 0.3698        | 0.03927397 |
| <i>foxp3</i>        | 1               | 22        | 6.090012  | 0.0218        | 0.2836478  |
| <i>tgf-β</i>        | 1               | 22        | 0.2983933 | 0.5904        | 0.2660784  |
| <i>tcr-β</i>        | 1               | 22        | 2.8142746 | 0.1076        | 0.1019166  |
| <i>il16</i>         | 1               | 22        | 2.9249314 | 0.1013        | 0.3136332  |
| <b><i>mhcII</i></b> | 1               | 22        | 15.711934 | <b>0.0007</b> | 0.3365486  |
| <i>complement</i>   | 1               | 1.6097    | 3.6639    | 0.0161        | 0.13192    |
| <i>cfb</i>          | 1               | 22        | 5.561498  | 0.0277        | 0.176698   |
| <i>c7</i>           | 1               | 22        | 0.0013976 | 0.9705        | 0.01687028 |
| <i>c9</i>           | 1               | 22        | 2.386635  | 0.1366        | 0.2022392  |

DE sticklebacks were infected with single *S. solidus* from the Pacific (ECH) or the Atlantic region (NU, SKO). All models are based on log10-transformed calibrated normalized relative quantities (CNRQ values) and include the weight of the fish as covariate to account for size related effects. Non-parametric permutational multivariate analyses of variance (PERMANOVA) were calculated on Euclidian distances and 10,000 permutations; permutations were constrained within 'round'. If results from multivariate statistics remained significant after FDR correction, single genes were analyzed with linear mixed models (LMMs) and analyses of variance (ANOVAs). Conditional pseudo R<sup>2</sup> values (Nakagawa and Schielzeth, 2013; Johnson, 2014) were calculated with the R package *piecewiseSEM* (Lefcheck, 2016). Differentially expressed genes are marked in bold letters if significant after FDR correction.

**Table S15.** The effect of parasite origin on immune gene expression in *S. solidus* infected NO sticklebacks (*contrast* 3: Pacific versus Baltic parasites)

| PERMANOVA results                    | Df                                   | SumsOfSqs | F.Model   | Pr(<F)             | R2         |
|--------------------------------------|--------------------------------------|-----------|-----------|--------------------|------------|
| all genes                            | 1                                    | 9.896     | 4.0409    | 0.0028             | 0.12559    |
| <i>innate</i>                        | 1                                    | 4.562     | 3.2630    | 0.006399           | 0.10441    |
| ANOVA results                        | numDF                                | denDF     | F-value   | p-value            | pseudo R2  |
| <b><i>marco</i></b>                  | 1                                    | 25        | 8.392080  | <b>0.0077</b>      | 0.2271724  |
| <i>mst1ra</i>                        | 1                                    | 25        | 3.77560   | 0.0633             | 0.03548697 |
| <b><i>mif1</i></b>                   | 1                                    | 25        | 5.541702  | <b>0.0267</b>      | 0.6104602  |
| <i>il-1<math>\beta</math></i>        | 1                                    | 25        | 4.012346  | 0.0561             | 0.2204628  |
| <b><i>tnfr1</i></b>                  | 1                                    | 25        | 17.895225 | <b>0.0003</b>      | 0.4698114  |
| <i>saal1</i>                         | 1                                    | 25        | 0.2236917 | 0.6403             | 0.02951859 |
| <i>tlr2</i>                          | 1                                    | 25        | 0.68259   | 0.4165             | 0.2310644  |
| <i>csf3r</i>                         | 1                                    | 25        | 3.0020583 | 0.0955             | 0.4896976  |
| <b><i>p22<sup>phox</sup></i></b>     | 1                                    | 25        | 7.051231  | <b>0.0136</b>      | 0.4252072  |
| <b><i>nkef-b</i></b>                 | 1                                    | 25        | 11.806990 | <b>0.0021</b>      | 0.4074129  |
| <b><i>sla1</i></b>                   | 1                                    | 25        | 16.878200 | <b>0.0004</b>      | 0.5575598  |
| <b><i>cd97</i></b>                   | 1                                    | 25        | 17.052705 | <b>0.0004</b>      | 0.1673577  |
| <i>adaptive</i>                      | 1                                    | 3.6002    | 5.7965    | 0.0020             | 0.16799    |
| <b><i>stat4</i></b>                  | 1                                    | 25        | 20.719634 | <b>0.0001</b>      | 0.3796316  |
| <i>stat6</i>                         | 1                                    | 25        | 2.5762096 | 0.1210             | 0.101408   |
| <i>igm</i>                           | 1                                    | 25        | 5.040543  | 0.0338             | 0.1895309  |
| <b><i>cd83</i></b>                   | 1                                    | 25        | 13.400433 | <b>0.0012</b>      | 0.4245893  |
| <b><i>foxp3</i></b>                  | 1                                    | 25        | 13.907577 | <b>0.0010</b>      | 0.4174076  |
| <b><i>tgf-<math>\beta</math></i></b> | 1                                    | 25        | 38.95597  | <b>&lt; 0.0001</b> | 0.2843239  |
| <i>tcr-<math>\beta</math></i>        | 1                                    | 25        | 0.9623782 | 0.3360             | 0.4709141  |
| <b><i>il16</i></b>                   | 1                                    | 25        | 20.30002  | <b>0.0001</b>      | 0.2542416  |
| <b><i>mhcII</i></b>                  | 1                                    | 25        | 11.242303 | <b>0.0025</b>      | 0.5879825  |
| <i>complement</i>                    | not significant after FDR correction |           |           |                    |            |

NO sticklebacks were infected with single *S. solidus* from the Pacific (ECH) or the Baltic region (OBB, NST, GOT). All models are based on log10-transformed calibrated normalized relative quantities (CNRQ values) and include the weight of the fish as covariate to account for size related effects. Non-parametric permutational multivariate analyses of variance (PERMANOVA) were calculated on Euclidian distances and 10,000 permutations; permutations were constrained within 'round'. If results from multivariate statistics remained significant after FDR correction, single genes were analyzed with linear mixed models (LMMs) and analyses of variance (ANOVAs). Conditional pseudo R<sup>2</sup> values (Nakagawa and Schielzeth, 2013; Johnson, 2014) were calculated with the R package *piecewiseSEM* (Lefcheck, 2016). Differentially expressed genes are marked in bold letters if significant after FDR correction.

**Table S16.** The effect of parasite origin on immune gene expression in *S. solidus* infected NO sticklebacks (*contrast 3*: Pacific versus Atlantic parasites)

| PERMANOVA results                | Df    | SumsOfSqs | F.Model    | Pr(<F)             | R2         |
|----------------------------------|-------|-----------|------------|--------------------|------------|
| all genes                        | 1     | 11.136    | 3.9272     | 0.0037             | 0.07781    |
| <i>innate</i>                    | 1     | 4.772     | 2.9472     | 0.0142             | 0.05932    |
| ANOVA results                    | numDF | denDF     | F-value    | p-value            | pseudo R2  |
| <i>marco</i>                     | 1     | 43        | 1.6216848  | 0.2097             | 0.1003356  |
| <b><i>mst1ra</i></b>             | 1     | 43        | 10.335062  | <b>0.0025</b>      | 0.06026265 |
| <i>mif1</i>                      | 1     | 43        | 0.24499306 | 0.6231             | 0.600834   |
| <b><i>il-1β</i></b>              | 1     | 43        | 7.41588    | <b>0.0093</b>      | 0.1414507  |
| <b><i>tnfr1</i></b>              | 1     | 43        | 9.378793   | <b>0.0038</b>      | 0.1669963  |
| <i>saal1</i>                     | 1     | 43        | 0.934775   | 0.3390             | 0.1185011  |
| <i>tlr2</i>                      | 1     | 43        | 2.2991785  | 0.1368             | 0.554773   |
| <i>csf3r</i>                     | 1     | 43        | 1.337027   | 0.2539             | 0.3369563  |
| <b><i>p22<sup>phox</sup></i></b> | 1     | 43        | 7.219358   | <b>0.0102</b>      | 0.2022315  |
| <b><i>nkef-b</i></b>             | 1     | 43        | 10.156009  | <b>0.0027</b>      | 0.08408415 |
| <b><i>sla1</i></b>               | 1     | 43        | 21.053776  | <b>&lt; 0.0001</b> | 0.09562046 |
| <b><i>cd97</i></b>               | 1     | 43        | 13.395692  | <b>0.0007</b>      | 0.07031316 |
| <i>adaptive</i>                  | 1     | 4.269     | 5.2682     | 0.0037             | 0.10309    |
| <b><i>stat4</i></b>              | 1     | 43        | 14.963542  | <b>0.0004</b>      | 0.1379449  |
| <i>stat6</i>                     | 1     | 43        | 2.9758228  | 0.0917             | 0.07796727 |
| <b><i>igm</i></b>                | 1     | 43        | 12.137119  | <b>0.0011</b>      | 0.2510531  |
| <b><i>cd83</i></b>               | 1     | 43        | 5.426821   | <b>0.0246</b>      | 0.2126779  |
| <b><i>foxp3</i></b>              | 1     | 43        | 7.771886   | <b>0.0079</b>      | 0.1427779  |
| <b><i>tgf-β</i></b>              | 1     | 43        | 15.66522   | <b>0.0003</b>      | 0.06727398 |
| <i>tcr-β</i>                     | 1     | 43        | 0.191459   | 0.6639             | 0.2949225  |
| <b><i>il16</i></b>               | 1     | 43        | 20.661348  | <b>&lt; 0.0001</b> | 0.1248736  |
| <b><i>mhcII</i></b>              | 1     | 43        | 8.220390   | <b>0.0064</b>      | 0.275311   |
| <i>complement</i>                | 1     | 2.0950    | 5.1591     | 0.007999           | 0.09852    |
| <i>cfb</i>                       | 1     | 43        | 3.007361   | 0.0901             | 0.1230495  |
| <i>c7</i>                        | 1     | 43        | 1.942404   | 0.1706             | 0.02336822 |
| <b><i>c9</i></b>                 | 1     | 43        | 17.776506  | <b>0.0001</b>      | 0.2357195  |

NO sticklebacks were infected with single *S. solidus* from Pacific (ECH) or the Atlantic region (NU, ISC, SKO). All models are based on log10-transformed calibrated normalized relative quantities (CNRQ values) and include the weight of the fish as covariate to account for size related effects. Non-parametric permutational multivariate analyses of variance (PERMANOVA) were calculated on Euclidian distances and 10,000 permutations; permutations were constrained within 'round'. If results from multivariate statistics remained significant after FDR correction, single genes were analyzed with linear mixed models (LMMs) and analyses of variance (ANOVAs). Conditional pseudo R<sup>2</sup> values (Nakagawa and Schielzeth, 2013; Johnson, 2014) were calculated with the R package piecewiseSEM (Lefcheck, 2016). Differentially expressed genes are marked in bold letters if significant after FDR correction.

### SI.5.2 Stickleback immune gene expression in infected versus control fish

ECH-infected DE sticklebacks had significantly higher expression of three genes of innate immunity, one gene of adaptive immunity (*foxp3*) and complement *c9*; RNA levels of *tcr-β* and *mhcII* were significantly lower than in controls (Table S17). NU-infected DE sticklebacks had significantly higher expression of five innate immune genes and two complement components; again, *tcr-β* was significantly lower expressed than in controls (Table S18). SKO-infected DE sticklebacks had significantly lower expression of the genes *igm* and *tcr-β* (Table S19).

In NO hosts, four genes were significantly higher expressed upon infection with the ECH strain; only RNA levels of *tlr2* were higher in controls. Infection with NU *S. solidus* was linked to lower RNA levels of *foxp3* and *tcr-β* in comparison to controls, *mhcII* RNA levels were higher (Table S20).

**Table S17.** The effect of Pacific (ECH) *S. solidus* infection on immune gene expression in DE sticklebacks

| PERMANOVA results                     | Df    | SumsOfSqs | F.Model   | Pr(<F)             | R2         |
|---------------------------------------|-------|-----------|-----------|--------------------|------------|
| all genes                             | 1     | 10.968    | 6.6963    | < 0.0001           | 0.17831    |
| <i>innate</i>                         | 1     | 5.1367    | 7.51      | < 0.0001           | 0.19545    |
| ANOVA results                         | numDF | denDF     | F-value   | p-value            | pseudo R2  |
| <i>marco</i>                          | 1     | 28        | 1.3223894 | 0.2599             | 0.04482254 |
| <i>mst1ra</i>                         | 1     | 28        | 4.963628  | 0.0341             | 0.1346899  |
| <b><i>mif1</i></b>                    | 1     | 28        | 22.335106 | <b>0.0001</b>      | 0.4110788  |
| <i>il-1<math>\beta</math></i>         | 1     | 28        | 4.135334  | 0.0516             | 0.4828812  |
| <b><i>tnfr1</i></b>                   | 1     | 28        | 38.28464  | <b>&lt; 0.0001</b> | 0.5536073  |
| <i>saal1</i>                          | 1     | 28        | 0.9519854 | 0.3376             | 0.04472742 |
| <i>tlr2</i>                           | 1     | 28        | 2.4176792 | 0.1312             | 0.05212668 |
| <b><i>csf3r</i></b>                   | 1     | 28        | 39.81470  | <b>&lt; 0.0001</b> | 0.5984884  |
| <i>p22<sup>phox</sup></i>             | 1     | 28        | 0.014436  | 0.9052             | 0.09826987 |
| <i>nkef-b</i>                         | 1     | 28        | 4.096781  | 0.0526             | 0.1156389  |
| <i>sla1</i>                           | 1     | 28        | 5.463977  | 0.0268             | 0.1726114  |
| <i>cd97</i>                           | 1     | 28        | 3.979375  | 0.0559             | 0.2699205  |
| <i>adaptive</i>                       | 1     | 3.7237    | 6.4701    | 0.0006             | 0.17312    |
| <i>stat4</i>                          | 1     | 28        | 0.7173548 | 0.4042             | 0.1566161  |
| <i>stat6</i>                          | 1     | 28        | 2.750128  | 0.1084             | 0.1536997  |
| <i>igm</i>                            | 1     | 28        | 0.577116  | 0.4538             | 0.05510709 |
| <i>cd83</i>                           | 1     | 28        | 0.8975855 | 0.3515             | 0.04130682 |
| <b><i>foxp3</i></b>                   | 1     | 28        | 10.969312 | <b>0.0026</b>      | 0.3648484  |
| <i>tgf-<math>\beta</math></i>         | 1     | 28        | 6.312335  | 0.0180             | 0.1654147  |
| <b><i>tcrc-<math>\beta</math></i></b> | 1     | 28        | 20.170149 | <b>0.0001</b>      | 0.6763045  |
| <i>il16</i>                           | 1     | 28        | 5.640592  | 0.0246             | 0.1530182  |
| <b><i>mhcII</i></b>                   | 1     | 28        | 7.095925  | <b>0.0127</b>      | 0.6559287  |
| <i>complement</i>                     | 1     | 2.11      | 5.5693    | 0.007              | 0.15362    |
| <i>cfb</i>                            | 1     | 28        | 1.0761172 | 0.3084             | 0.05403997 |
| <i>c7</i>                             | 1     | 28        | 6.37071   | 0.0176             | 0.2160032  |
| <b><i>c9</i></b>                      | 1     | 28        | 15.702800 | <b>0.0005</b>      | 0.3294452  |

DE sticklebacks were infected with single *S. solidus* from the Pacific region (ECH) or sham-exposed as controls. All models are based on log<sub>10</sub>-transformed calibrated normalized relative quantities (CNRQ values) and include the weight of the fish as covariate to account for size related effects. If results from multivariate statistics remained significant after FDR correction, single genes were analyzed with linear mixed models (LMMs) and analyses of variance (ANOVAs). Conditional pseudo R<sup>2</sup> values (Nakagawa and Schielzeth, 2013; Johnson, 2014) were calculated with the function `sem.model.fits()` from *piecewiseSEM* (Lefcheck, 2016). Differentially expressed genes are marked in bold letters if significant after FDR correction.

**Table S18.** The effect of Atlantic (NU) *S. solidus* infection on immune gene expression in DE sticklebacks

| PERMANOVA results                  | Df    | SumsOfSqs | F.Model   | Pr(<F)             | R2          |
|------------------------------------|-------|-----------|-----------|--------------------|-------------|
| all genes                          | 1     | 6.3423    | 4.5438    | 0.0022             | 0.11700     |
| <i>innate</i>                      | 1     | 3.2598    | 4.8912    | 0.0034             | 0.12816     |
| ANOVA results                      | numDF | denDF     | F-value   | p-value            | pseudo R2   |
| <b><i>marco</i></b>                | 1     | 31        | 21.277178 | <b>0.0001</b>      | 0.2247061   |
| <b><i>mst1ra</i></b>               | 1     | 31        | 41.52767  | <b>&lt; 0.0001</b> | 0.3802244   |
| <i>mif1</i>                        | 1     | 31        | 2.8351053 | 0.1023             | 0.07494536  |
| <i>il-1<math>\beta</math></i>      | 1     | 31        | 1.3225529 | 0.2589             | 0.4956676   |
| <b><i>tnfr1</i></b>                | 1     | 31        | 17.84915  | <b>0.0002</b>      | 0.3553141   |
| <i>saal1</i>                       | 1     | 31        | 1.1572809 | 0.2903             | 0.03720579  |
| <i>tlr2</i>                        | 1     | 31        | 0.1355171 | 0.7153             | 0.171688    |
| <b><i>csf3r</i></b>                | 1     | 31        | 9.019195  | <b>0.0052</b>      | 0.3367392   |
| <i>p22<sup>phox</sup></i>          | 1     | 31        | 0.0842680 | 0.7735             | 0.1051056   |
| <i>nkef-b</i>                      | 1     | 31        | 0.2753085 | 0.6035             | 0.1033829   |
| <i>sla1</i>                        | 1     | 31        | 0.5254048 | 0.4740             | 0.215329    |
| <i>cd97</i>                        | 1     | 31        | 3.792486  | 0.0606             | 0.1558379   |
| <b><i>adaptive</i></b>             | 1     | 1.817     | 3.925     | 0.009              | 0.0983      |
| <i>stat4</i>                       | 1     | 31        | 0.1487538 | 0.7024             | 0.2565489   |
| <i>stat6</i>                       | 1     | 31        | 5.427391  | 0.0265             | 0.225471    |
| <i>igm</i>                         | 1     | 31        | 0.002153  | 0.9633             | 0.003609847 |
| <i>cd83</i>                        | 1     | 31        | 1.2962914 | 0.2636             | 0.3051214   |
| <i>foxp3</i>                       | 1     | 31        | 0.122438  | 0.7288             | 0.1561726   |
| <i>tgf-<math>\beta</math></i>      | 1     | 31        | 6.105449  | 0.0192             | 0.1567034   |
| <b><i>tc<math>\beta</math></i></b> | 1     | 31        | 19.427037 | <b>0.0001</b>      | 0.6016856   |
| <i>il16</i>                        | 1     | 31        | 0.0135641 | 0.9080             | 0.1486146   |
| <i>mhcII</i>                       | 1     | 31        | 4.943850  | 0.0336             | 0.2853142   |
| <b><i>complement</i></b>           | 1     | 1.2655    | 4.7503    | 0.0140             | 0.12308     |
| <i>cfb</i>                         | 1     | 31        | 0.317478  | 0.5772             | 0.01028082  |
| <b><i>c7</i></b>                   | 1     | 31        | 13.294900 | <b>0.0010</b>      | 0.3283917   |
| <b><i>c9</i></b>                   | 1     | 31        | 9.197163  | <b>0.0049</b>      | 0.3806867   |

DE sticklebacks were infected with single *S. solidus* from Scotland (NU) or sham-exposed as controls. All models are based on log<sub>10</sub>-transformed calibrated normalized relative quantities (CNRQ values) and include the weight of the fish as covariate to account for size related effects. If results from multivariate statistics remained significant after FDR correction, single genes were analyzed with linear mixed models (LMMs) and analyses of variance (ANOVAs). Conditional pseudo R<sup>2</sup> values (Nakagawa and Schielzeth, 2013; Johnson, 2014) were calculated with the function `sem.model.fits()` from *piecewiseSEM* (Lefcheck, 2016). Differentially expressed genes are marked in bold letters if significant after FDR correction.



**Table S19.** The effect of Atlantic (SKO) *S. solidus* infection on immune gene expression in DE sticklebacks

| PERMANOVA results   | Df    | SumsOfSqs | F.Model    | Pr(<F)             | R2          |
|---------------------|-------|-----------|------------|--------------------|-------------|
| all genes           | 1     | 8.252     | 4.8340     | 0.0016             | 0.12456     |
| <i>adaptive</i>     | 1     | 4.7356    | 8.7604     | < 0.0001           | 0.20144     |
| ANOVA results       | numDF | denDF     | F-value    | p-value            | pseudo R2   |
| <i>stat4</i>        | 1     | 31        | 6.408154   | 0.0166             | 0.3467709   |
| <i>stat6</i>        | 1     | 31        | 1.371914   | 0.2504             | 0.1504773   |
| <b><i>igm</i></b>   | 1     | 31        | 21.017566  | <b>0.0001</b>      | 0.3755734   |
| <i>cd83</i>         | 1     | 31        | 4.057735   | 0.0527             | 0.1049793   |
| <i>foxp3</i>        | 1     | 31        | 0.6079386  | 0.4415             | 0.3040527   |
| <i>tgf-β</i>        | 1     | 31        | 1.734336   | 0.1975             | 0.05518428  |
| <b><i>tcr-β</i></b> | 1     | 31        | 80.30430   | <b>&lt; 0.0001</b> | 0.7823056   |
| <i>il16</i>         | 1     | 31        | 0.01339549 | 0.9086             | 0.008679018 |
| <i>mhcII</i>        | 1     | 31        | 4.254542   | 0.0476             | 0.2047914   |
| <i>complement</i>   | 1     | 1.2540    | 3.4196     | 0.0278             | 0.09219     |
| <i>cfb</i>          | 1     | 31        | 5.623478   | 0.0241             | 0.1556643   |
| <i>c7</i>           | 1     | 31        | 1.80347    | 0.1890             | 0.0803123   |
| <i>c9</i>           | 1     | 31        | 0.1222875  | 0.7289             | 0.3124093   |

DE sticklebacks were infected with single *S. solidus* from Norway (SKO) or sham-exposed as controls. All models are based on log<sub>10</sub>-transformed calibrated normalized relative quantities (CNRQ values) and include the weight of the fish as covariate to account for size related effects. If results from multivariate statistics remained significant after FDR correction, single genes were analyzed with linear mixed models (LMMs) and analyses of variance (ANOVAs). Conditional pseudo R<sup>2</sup> values (Nakagawa and Schielzeth, 2013; Johnson, 2014) were calculated with the function `sem.model.fits()` from *piecewiseSEM* (Lefcheck, 2016). Differentially expressed genes are marked in bold letters if significant after FDR correction.

**Table S20.** The effect of *S. solidus* infection on immune gene expression in NO sticklebacks

| CTRL vs ECH                   |       |           |            |                    |           |  |
|-------------------------------|-------|-----------|------------|--------------------|-----------|--|
| PERMANOVA results             | Df    | SumsOfSqs | F.Model    | Pr(<F)             | R2        |  |
| all genes                     | 1     | 13.034    | 5.7731     | 0.006799           | 0.18870   |  |
| <i>innate</i>                 | 1     | 8.038     | 5.4255     | 0.0118             | 0.18141   |  |
| ANOVA results                 | numDF | denDF     | F-value    | p-value            | pseudo R2 |  |
| <b>marco</b>                  | 1     | 22        | 7.480525   | <b>0.0121</b>      | 0.6146342 |  |
| <b>mst1ra</b>                 | 1     | 22        | 55.38068   | <b>&lt; 0.0001</b> | 0.420314  |  |
| <i>mif1</i>                   | 1     | 22        | 1.7377567  | 0.2010             | 0.6540345 |  |
| <i>il-1<math>\beta</math></i> | 1     | 22        | 4.584579   | 0.0436             | 0.1603913 |  |
| <b>tnfr1</b>                  | 1     | 22        | 7.089261   | <b>0.0142</b>      | 0.6098981 |  |
| <i>saal1</i>                  | 1     | 22        | 0.03122978 | 0.8613             | 0.3679037 |  |
| <b>tlr2</b>                   | 1     | 22        | 7.701943   | <b>0.0110</b>      | 0.2455484 |  |
| <i>csf3r</i>                  | 1     | 22        | 0.7428609  | 0.3980             | 0.6157382 |  |
| <i>p22<sup>phox</sup></i>     | 1     | 22        | 6.769916   | 0.0163             | 0.2206684 |  |
| <i>nkef-b</i>                 | 1     | 22        | 3.1618774  | 0.0892             | 0.402492  |  |
| <i>sla1</i>                   | 1     | 22        | 4.423985   | 0.0471             | 0.3688205 |  |
| <i>cd97</i>                   | 1     | 22        | 0.0128443  | 0.9108             | 0.7624587 |  |
| <i>complement</i>             | 1     | 7.0196    | 7.6098     | 0.007799           | 0.23142   |  |
| <i>cfb</i>                    | 1     | 22        | 1.338124   | 0.2598             | 0.1066028 |  |
| <i>c7</i>                     | 1     | 22        | 6.080528   | 0.0219             | 0.26121   |  |
| <b>c9</b>                     | 1     | 22        | 11.663511  | <b>0.0025</b>      | 0.3391339 |  |
| CTRL vs NU                    |       |           |            |                    |           |  |
| all genes                     | 1     | 7.162     | 2.77725    | 0.008699           | 0.06827   |  |
| <i>adaptive</i>               | 1     | 3.9791    | 5.7140     | 0.0016             | 0.13059   |  |
| ANOVA results                 | numDF | denDF     | F-value    | p-value            | pseudo R2 |  |
| <i>stat4</i>                  | 1     | 35        | 4.555951   | 0.0399             | 0.1020942 |  |
| <i>stat6</i>                  | 1     | 35        | 1.708545   | 0.1997             | 0.0958445 |  |
| <i>igm</i>                    | 1     | 35        | 4.462372   | 0.0419             | 0.5772781 |  |
| <i>cd83</i>                   | 1     | 35        | 3.0748604  | 0.0883             | 0.5380313 |  |
| <b>foxp3</b>                  | 1     | 35        | 12.229478  | <b>0.0013</b>      | 0.3642791 |  |
| <i>tgf-<math>\beta</math></i> | 1     | 35        | 0.00923769 | 0.9240             | 0.150044  |  |
| <b>tc<math>\beta</math></b>   | 1     | 35        | 18.261184  | <b>0.0001</b>      | 0.3470945 |  |
| <i>il16</i>                   | 1     | 35        | 2.0088023  | 0.1652             | 0.1248851 |  |
| <b>mhcII</b>                  | 1     | 35        | 38.17083   | <b>&lt; 0.0001</b> | 0.5933614 |  |

NO sticklebacks were infected with single *S. solidus* from the Pacific region (ECH) or Scotland (NU) or sham-exposed as controls (CTRL). All models are based on log<sub>10</sub>-transformed calibrated normalized relative quantities (CNRQ values) and include the weight of the fish as covariate to account for size related effects. If results from multivariate statistics remained significant after FDR correction, single genes were analyzed with linear mixed models (LMMs) and analyses of variance (ANOVAs). Conditional pseudo R<sup>2</sup> values (Nakagawa and Schielzeth, 2013; Johnson, 2014) were calculated with the function `sem.model.fits()` from *piecewiseSEM* (Lefcheck, 2016). Differentially expressed genes are marked in bold letters if significant after FDR correction.

SI.5.3 NMDS: infected versus control DE sticklebacks (contrast 2)

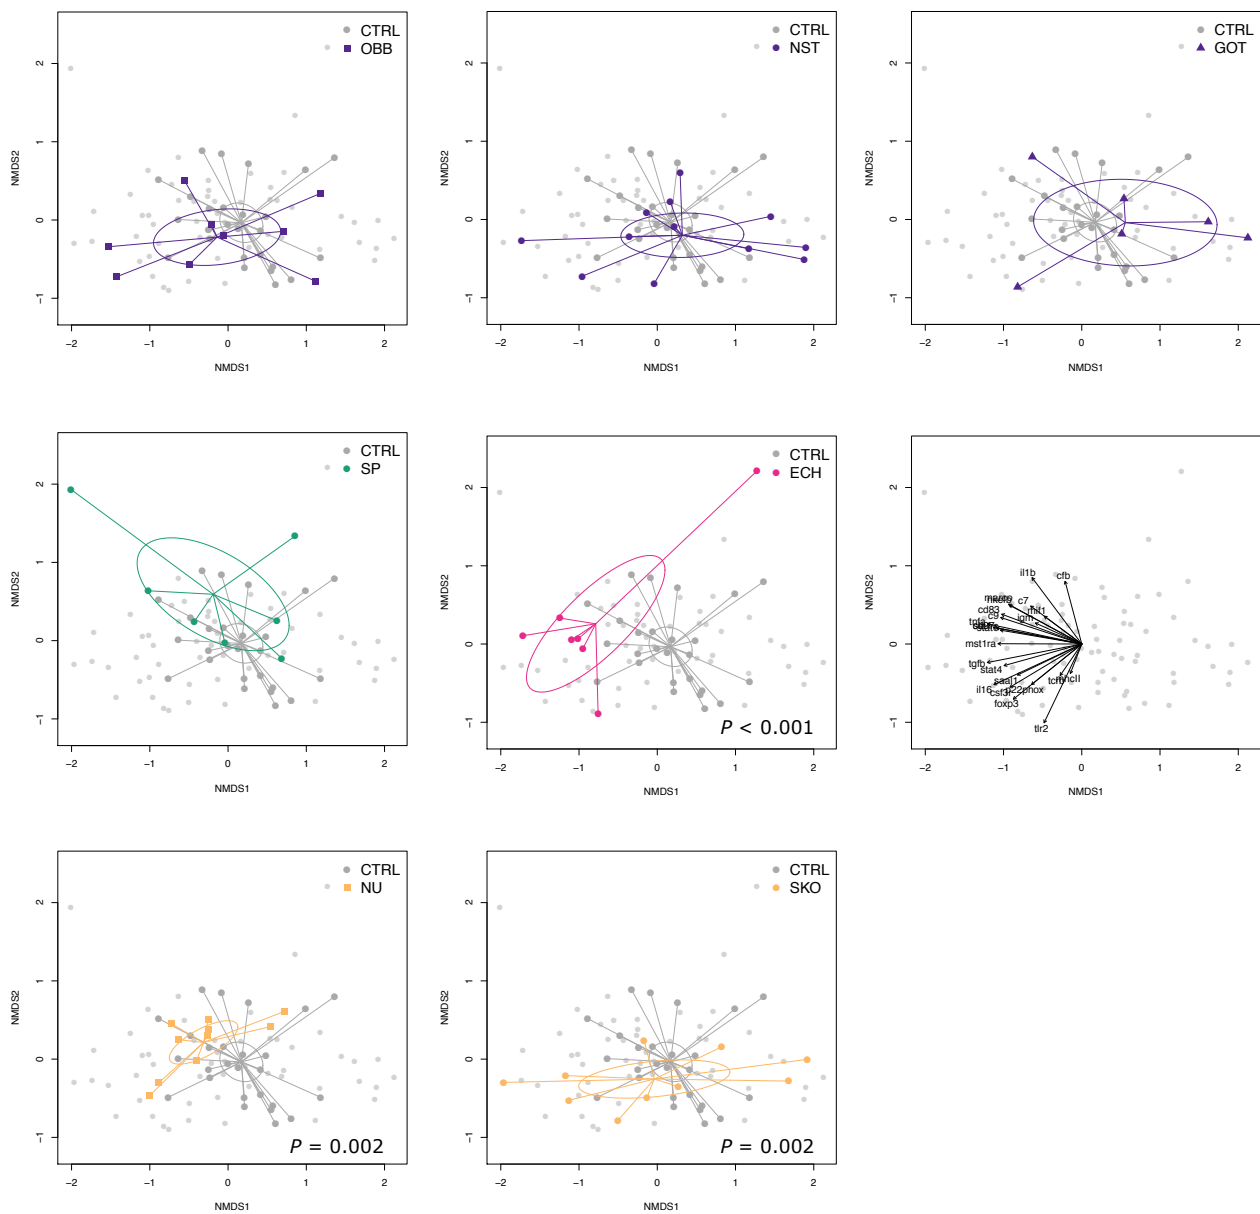

**Figure S7.** Non-metric multidimensional scaling (NMDS) plots on Euclidian distances and two dimensions showing multivariate data from 24 immune genes of infected and sham-exposed DE sticklebacks (2014). Each dot represents one individual; data from infected fish is colored. Ellipses represent 95% confidence intervals. *P*-values are shown if significant after FDR-correction.

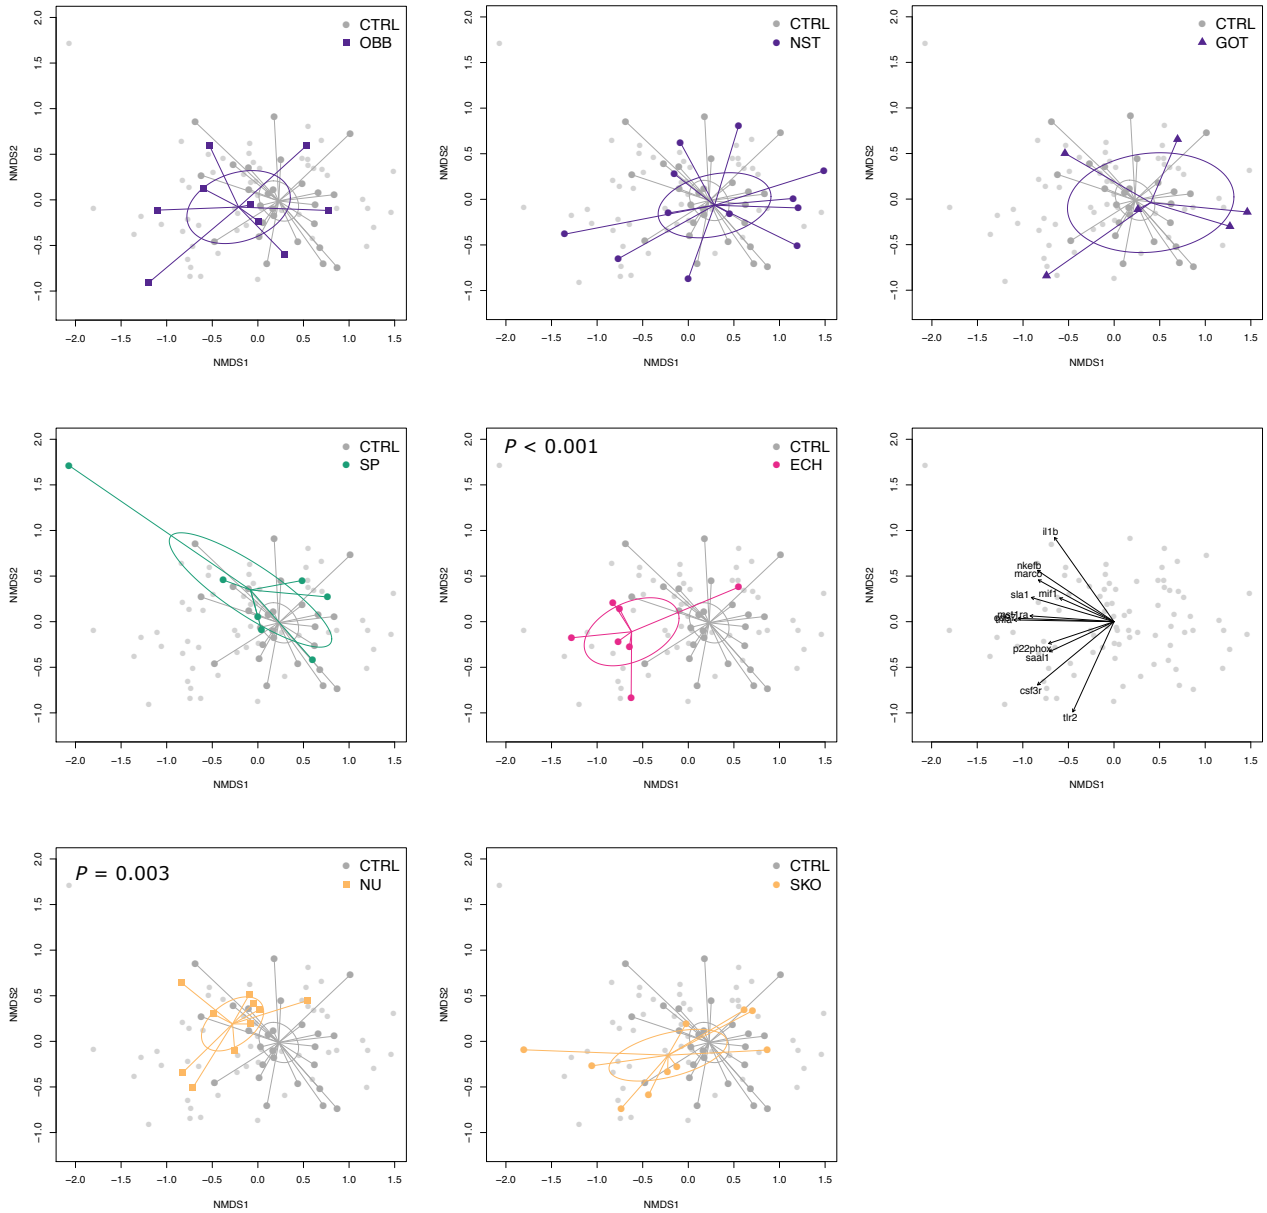

**Figure S8.** Non-metric multidimensional scaling (NMDS) plots on Euclidian distances and two dimensions showing multivariate data from 12 innate immune genes of infected and sham-exposed (CTRL) DE sticklebacks (2014). Each dot represents one individual; data from infected fish is colored. Ellipses represent 95% confidence intervals.  $P$ -values are shown if significant after FDR-correction.

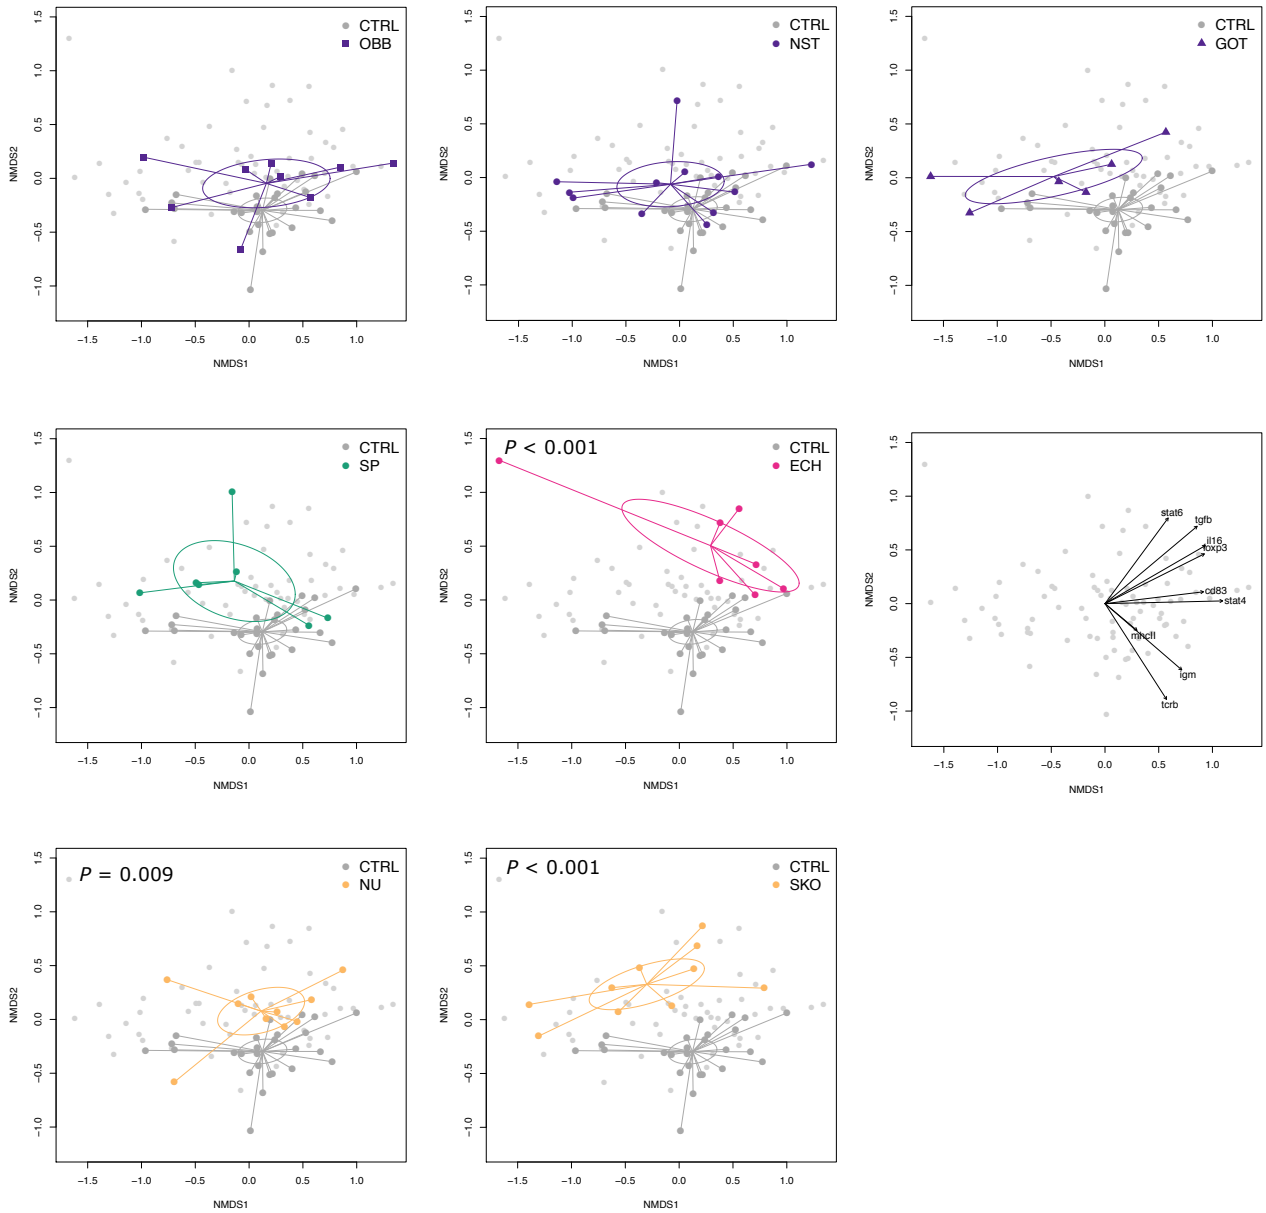

**Figure S9.** Non-metric multidimensional scaling (NMDS) plots on Euclidian distances and two dimensions showing multivariate data from 9 genes of the adaptive immune system of infected and sham-exposed (CTRL) DE sticklebacks (2014). Each dot represents one individual; data from infected fish is colored. Ellipses represent 95% confidence intervals. *P*-values are shown if significant after FDR-correction.

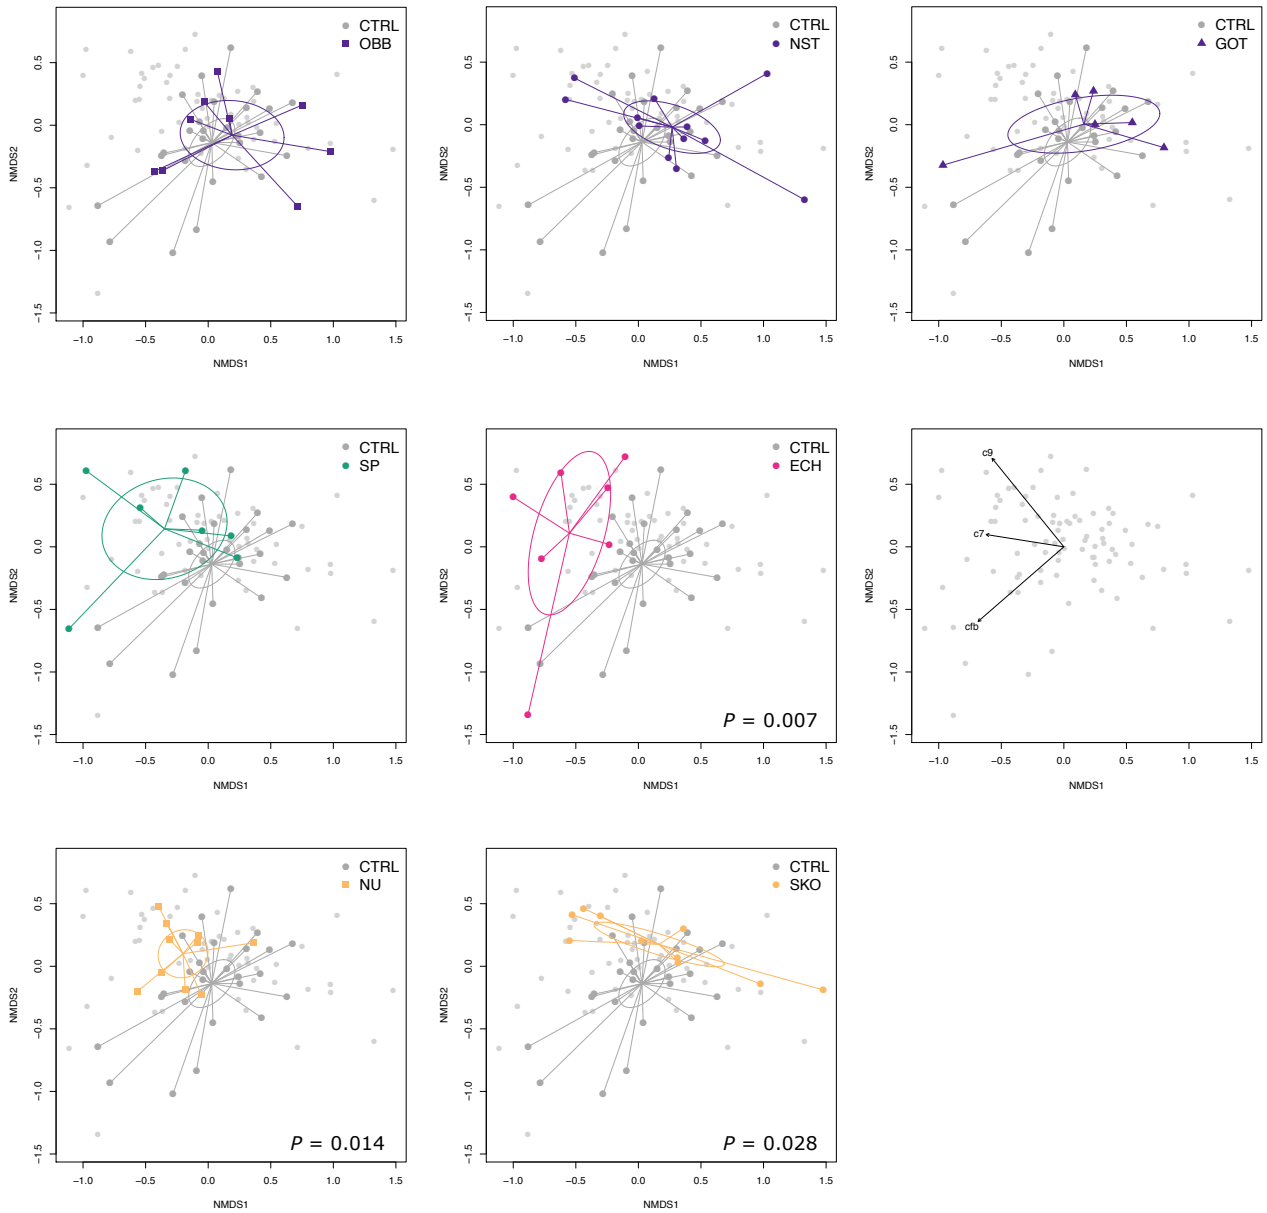

**Figure S10.** Non-metric multidimensional scaling (NMDS) plots on Euclidian distances and two dimensions showing multivariate data from three genes of the complement system of infected and sham-exposed DE sticklebacks (2014). Each dot represents one individual; data from infected fish is colored. Ellipses represent 95% confidence intervals. *P*-values are shown if significant after FDR-correction.

SI.5.4 NMDS: infected versus control NO sticklebacks (contrast 3)

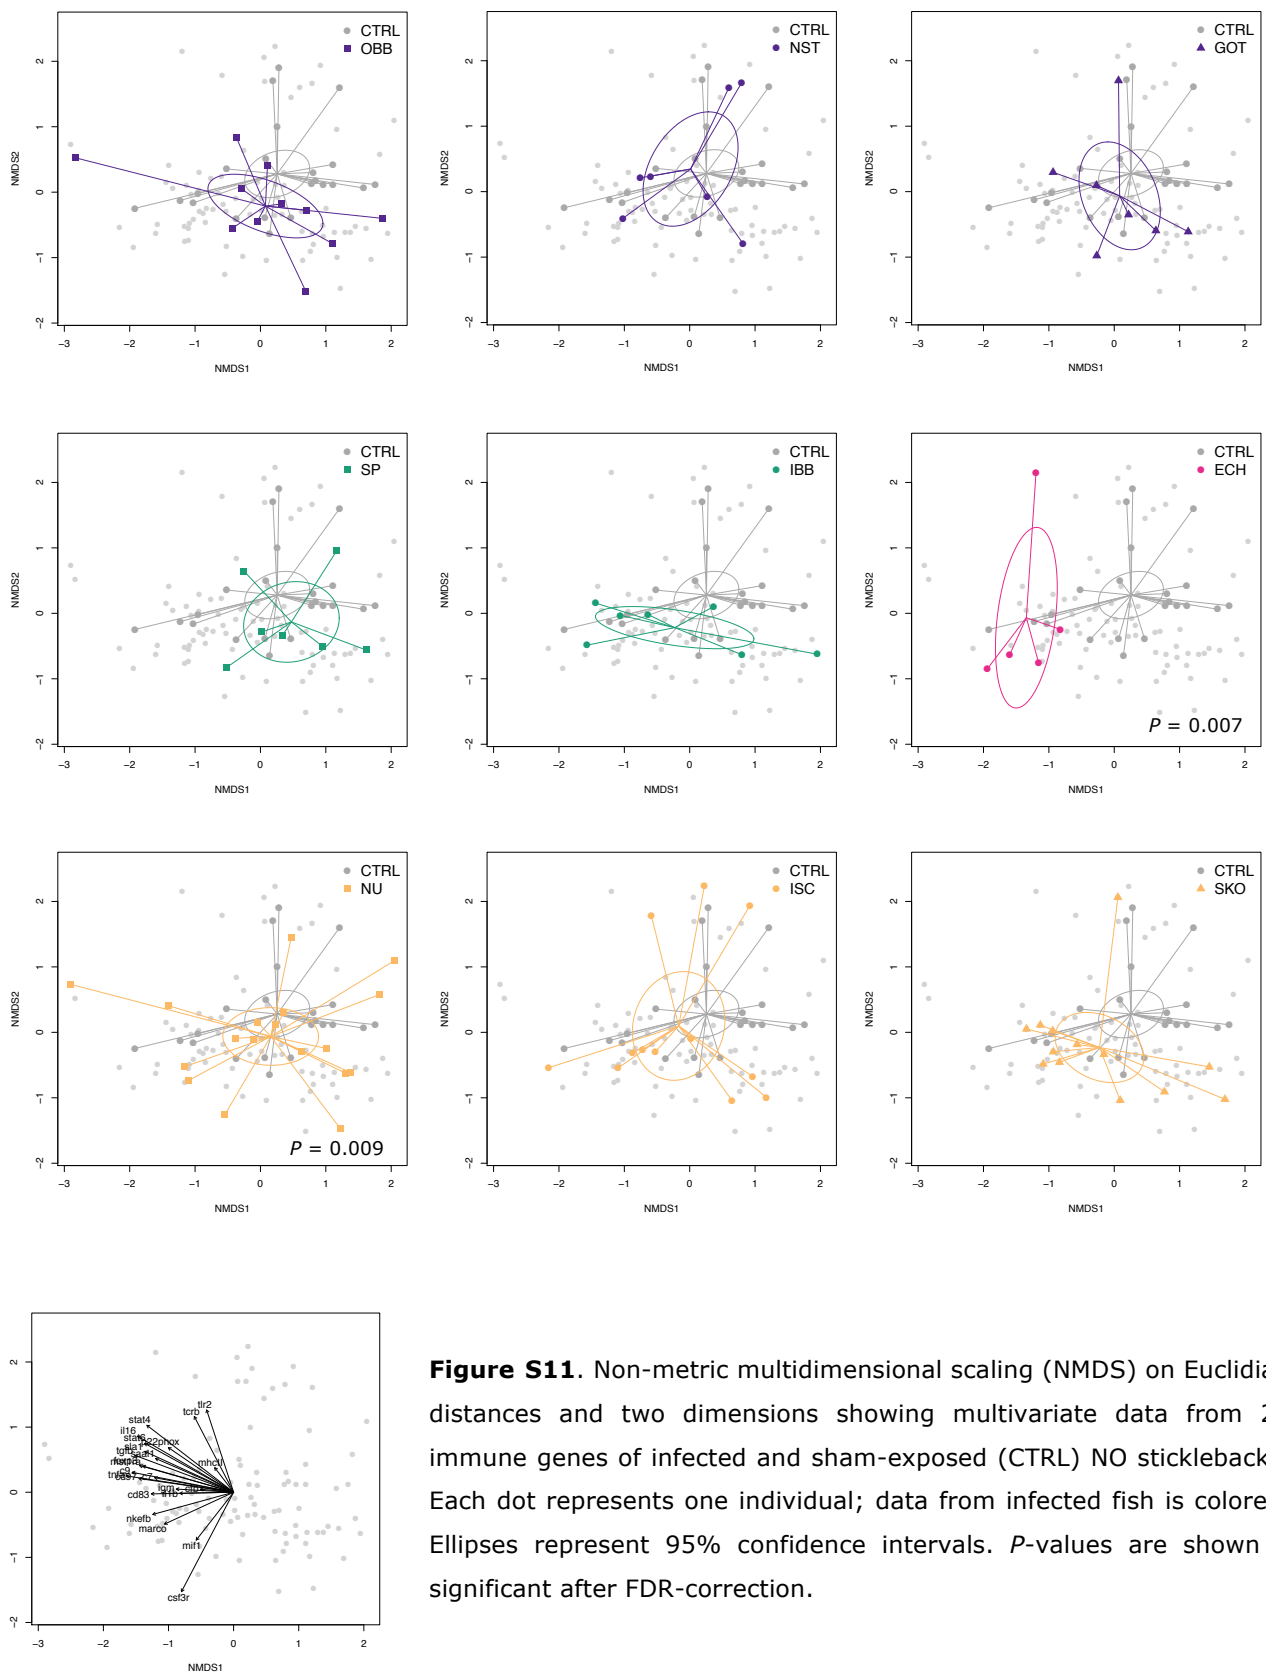

**Figure S11.** Non-metric multidimensional scaling (NMDS) on Euclidian distances and two dimensions showing multivariate data from 24 immune genes of infected and sham-exposed (CTRL) NO sticklebacks. Each dot represents one individual; data from infected fish is colored. Ellipses represent 95% confidence intervals.  $P$ -values are shown if significant after FDR-correction.

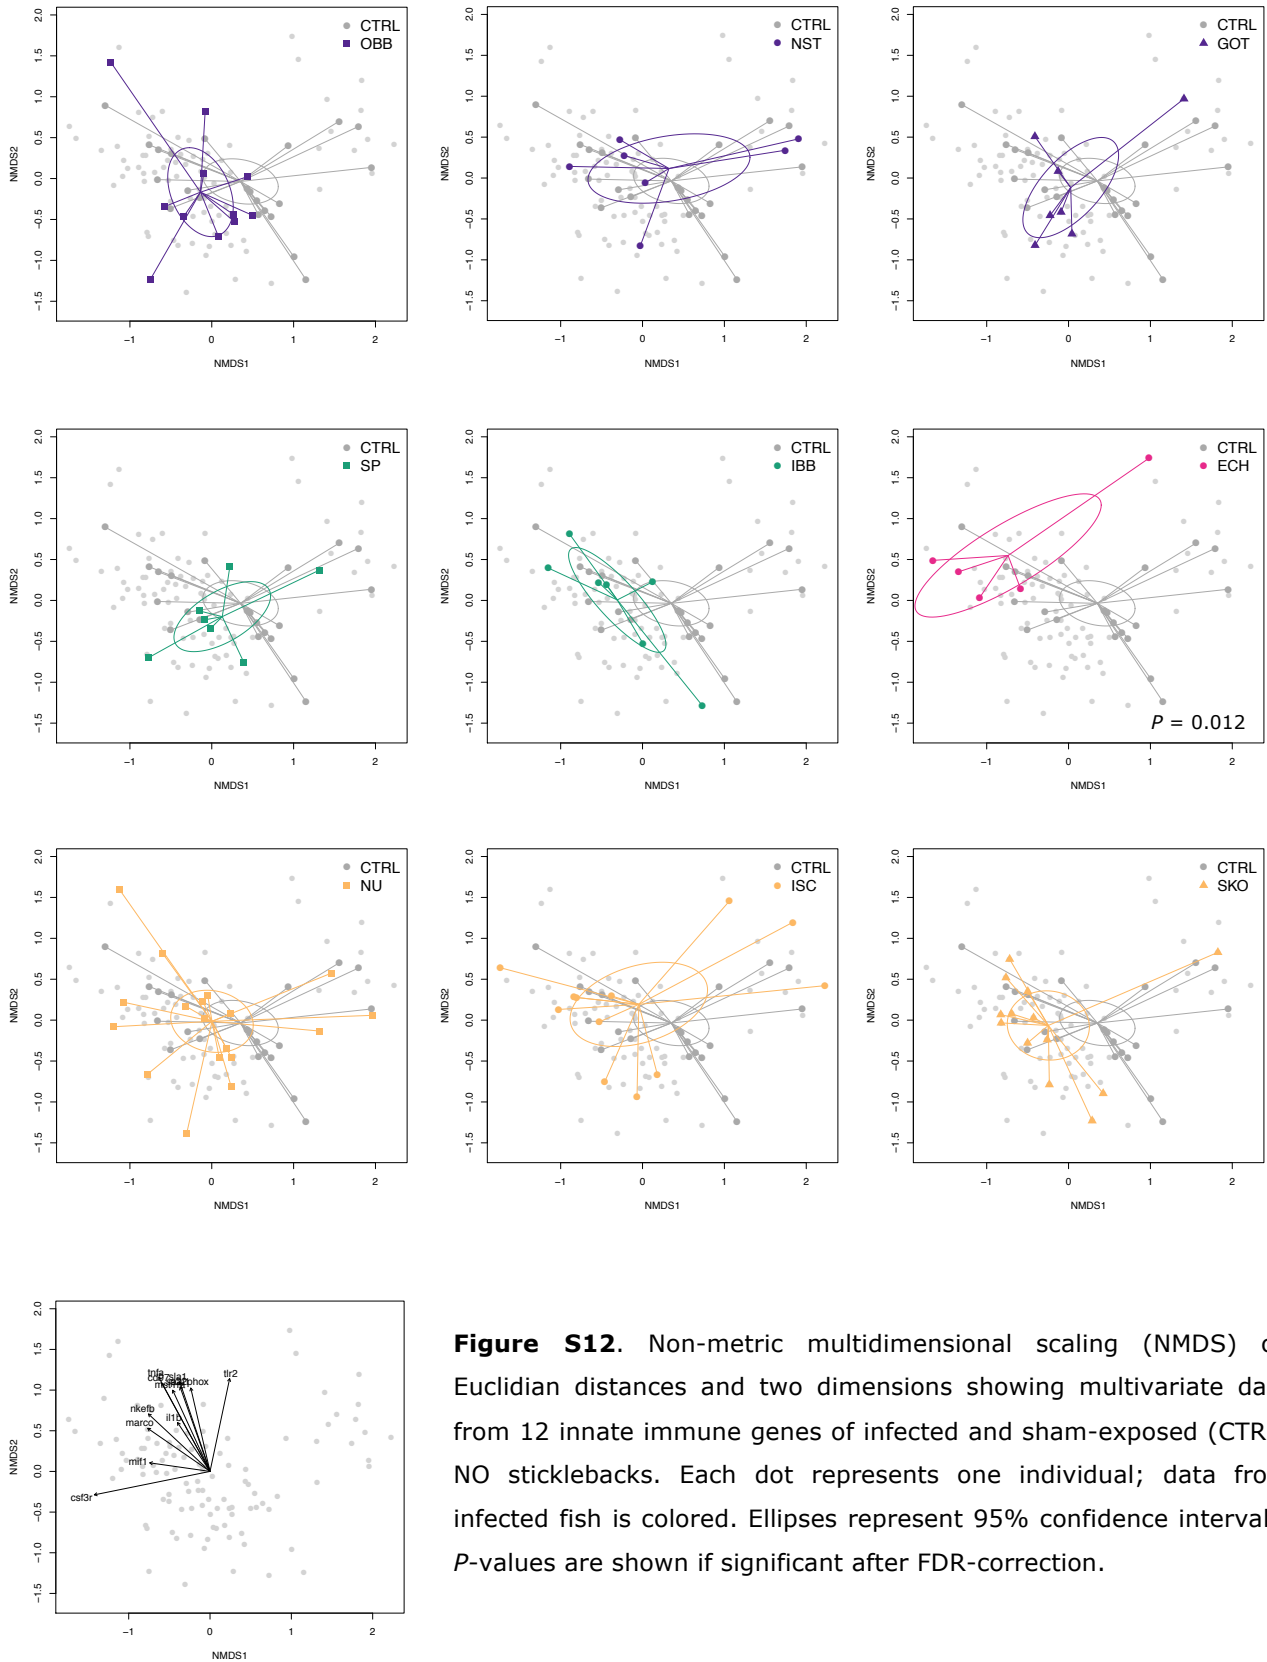

**Figure S12.** Non-metric multidimensional scaling (NMDS) on Euclidian distances and two dimensions showing multivariate data from 12 innate immune genes of infected and sham-exposed (CTRL) NO sticklebacks. Each dot represents one individual; data from infected fish is colored. Ellipses represent 95% confidence intervals. P-values are shown if significant after FDR-correction.



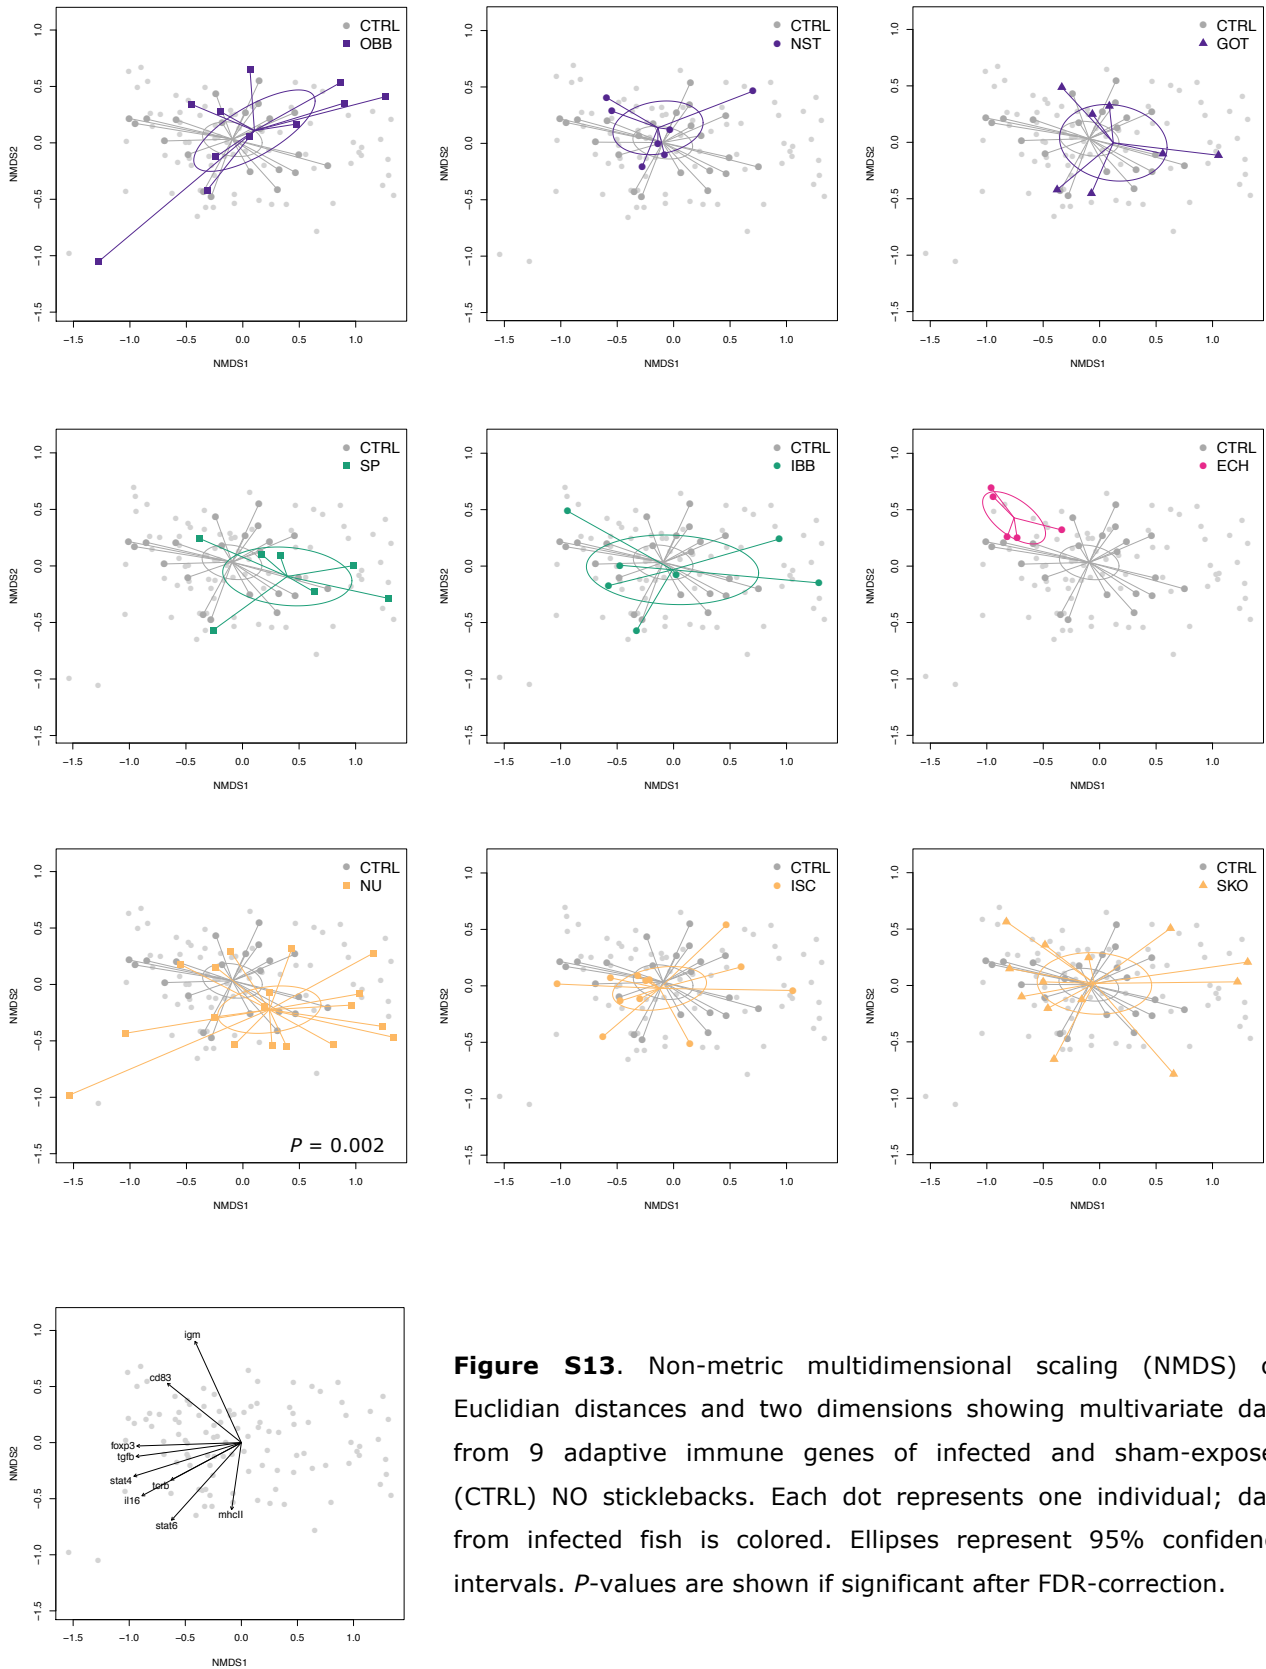

**Figure S13.** Non-metric multidimensional scaling (NMDS) on Euclidian distances and two dimensions showing multivariate data from 9 adaptive immune genes of infected and sham-exposed (CTRL) NO sticklebacks. Each dot represents one individual; data from infected fish is colored. Ellipses represent 95% confidence intervals.  $P$ -values are shown if significant after FDR-correction.

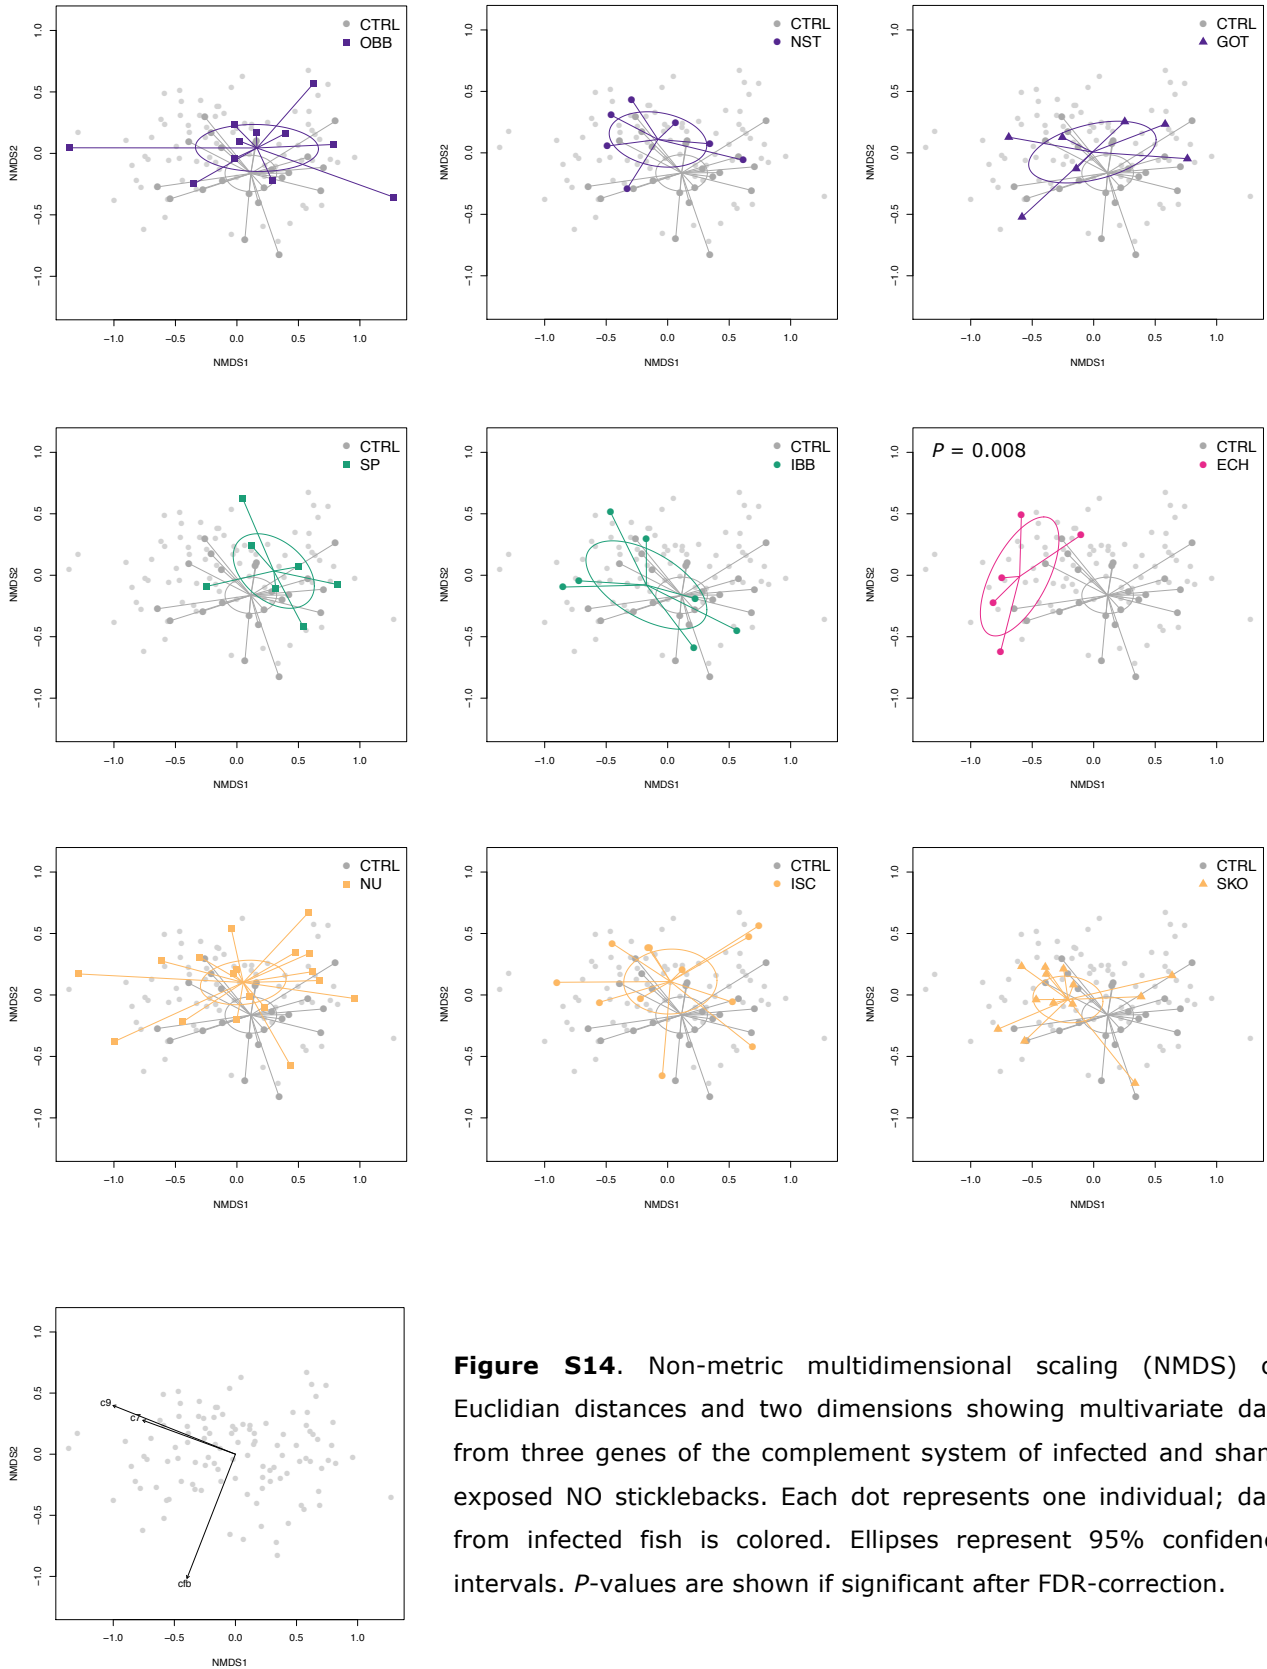

**Figure S14.** Non-metric multidimensional scaling (NMDS) on Euclidian distances and two dimensions showing multivariate data from three genes of the complement system of infected and sham-exposed NO sticklebacks. Each dot represents one individual; data from infected fish is colored. Ellipses represent 95% confidence intervals.  $P$ -values are shown if significant after FDR-correction.

### SI.5.5 NMDS: infected versus control DE sticklebacks (in contrast 1)

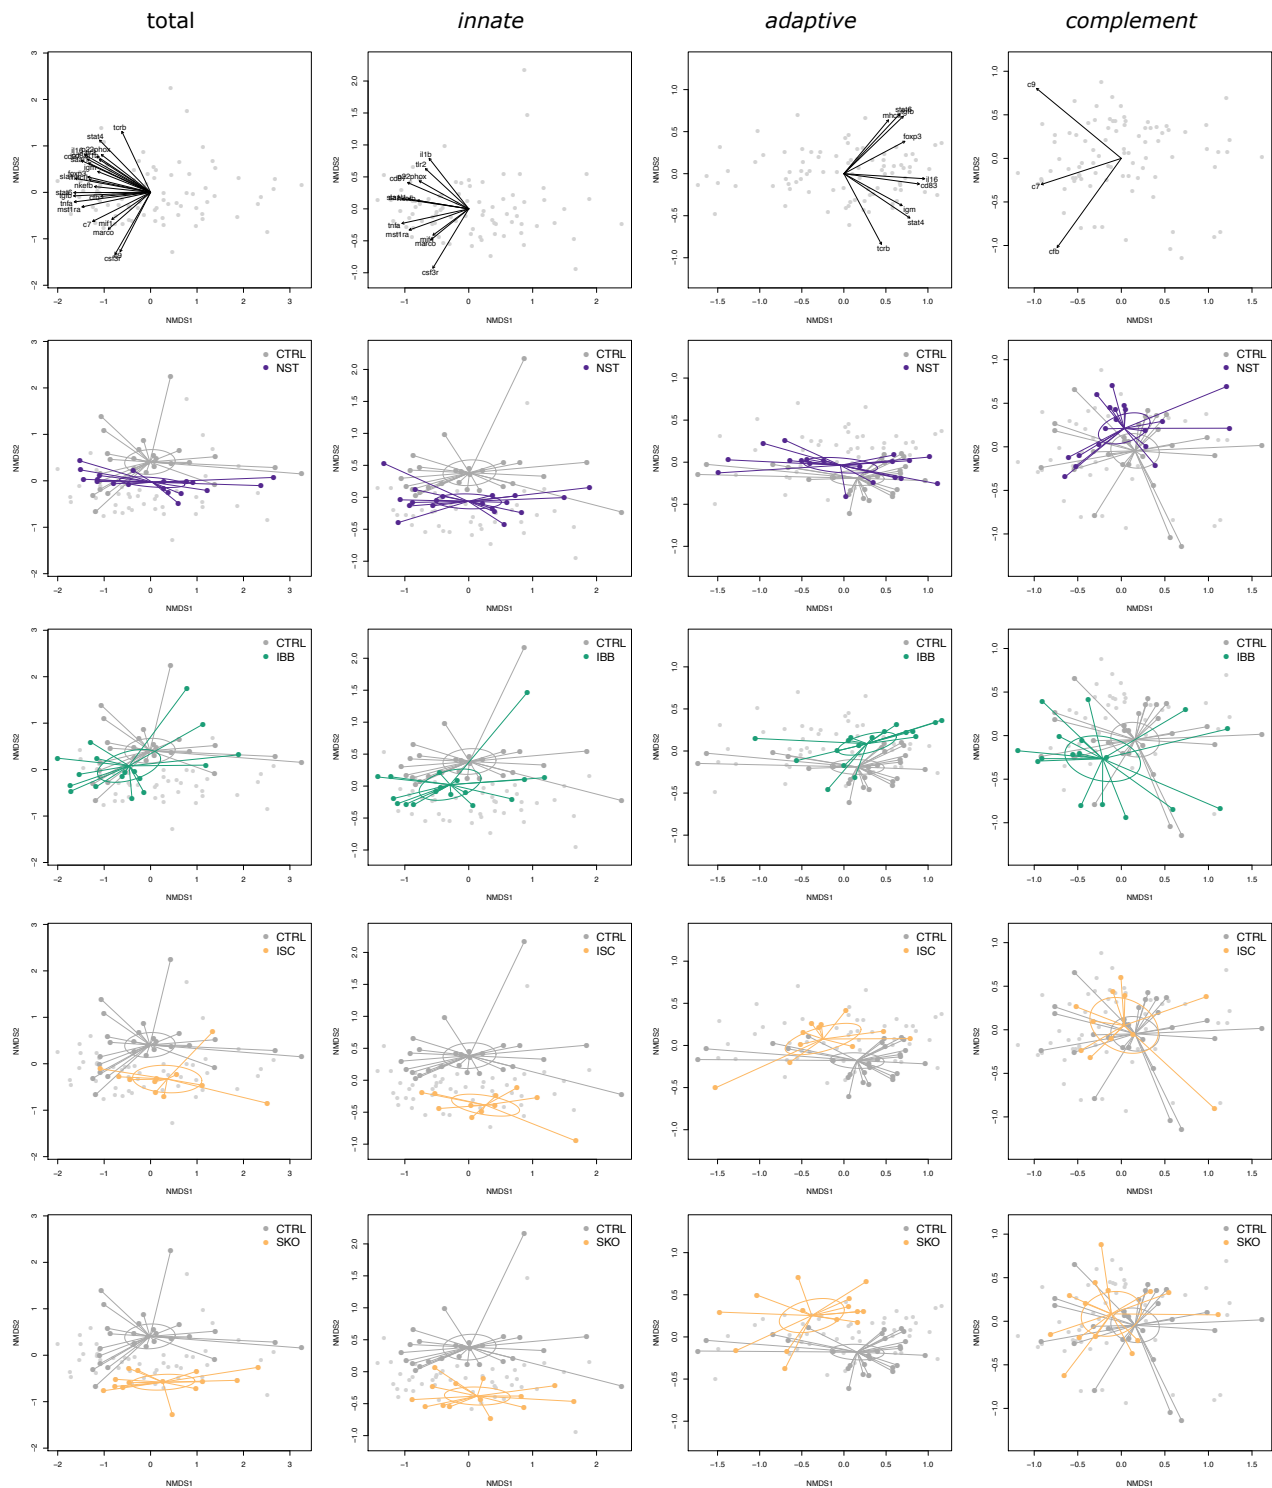

**Figure S15.** Non-metric multidimensional scaling (NMDS) plots on Euclidian distances and two dimensions showing multivariate data from infected and sham-exposed (CTRL) DE sticklebacks (2015). NMDS were based on log<sub>10</sub>-transformed CNRQ values of all 24 immune genes, 12 genes of the innate immune system (*marco*, *mst1ra*, *mif*, *il-1 $\beta$* , *tnf-a*, *saal1*, *tlr2*, *csf3r*, *p22<sup>phox</sup>*, *nkef-b*, *sla1*, *cd97*), 9 genes of the adaptive immune system (*stat4*, *stat6*, *igm*, *cd83*, *foxp3*, *tgf- $\beta$* , *il-16*, *mhcII*, *tcr- $\beta$* ), or three genes of the complement system (*cfb*, *c7*, *c9*). Each dot represents one individual; colors refer to the origin of *S. solidus* in infected fish. Ellipses represent 95% confidence intervals. *P*-values are not indicated, because none were significant after FDR-correction.

## References

- Bates, D., Mächler, M., Bolker, B., and Walker, S. (2014). Fitting Linear Mixed-Effects Models using lme4. ArXiv14065823 Stat.
- Chellappa, S., Huntingford, F.A., Strang, R.H.C., and Thomson, R.Y. (1995). Condition factor and hepatosomatic index as estimates of energy status in male three-spined stickleback. *J. Fish Biol.* *47*, 775–787.
- Frischknecht, M. (1993). The breeding colouration of male three-spined sticklebacks (*Gasterosteus aculeatus*) as an indicator of energy investment in vigour. *Evol. Ecol.* *7*, 439–450.
- Hammerschmidt, K., and Kurtz, J. (2005). Evolutionary implications of the adaptation to different immune systems in a parasite with a complex life cycle. *Proc. R. Soc. B Biol. Sci.* *272*, 2511–2518.
- Hothorn, T., Bretz, F., and Westfall, P. (2008). Simultaneous inference in general parametric models. *Biom. J.* *50*, 346–363.
- Johnson, P.C.D. (2014). Extension of Nakagawa & Schielzeth's R2GLMM to random slopes models. *Methods Ecol. Evol.* *5*, 944–946.
- Kurtz, J., Kalbe, M., Aeschlimann, P.B., Häberli, M.A., Wegner, K.M., Reusch, T.B.H., and Milinski, M. (2004). Major histocompatibility complex diversity influences parasite resistance and innate immunity in sticklebacks. *Proc. R. Soc. Lond. B Biol. Sci.* *271*, 197–204.
- Lefcheck, J.S. (2016). piecewiseSEM: Piecewise structural equation modelling in r for ecology, evolution, and systematics. *Methods Ecol. Evol.* *7*, 573–579.
- Nakagawa, S., and Schielzeth, H. (2013). A general and simple method for obtaining R2 from generalized linear mixed-effects models. *Methods Ecol. Evol.* *4*, 133–142.
- Pechhold, K., Pohl, T., and Kabelitz, D. (1994). Rapid quantification of lymphocyte subsets in heterogeneous cell populations by flow cytometry. *Cytometry* *16*, 152–159.
- Scharsack, J.P., Kalbe, M., Derner, R., Kurtz, J., and Milinski, M. (2004). Modulation of granulocyte responses in three-spined sticklebacks *Gasterosteus aculeatus* infected with the tapeworm *Schistocephalus solidus*. *Dis. Aquat. Organ.* *59*, 141–150.
- Scott, A.L., and Klesius, P.H. (1981). Chemiluminescence: A novel analysis of phagocytosis in fish. *Dev. Biol. Stand.* *49*, 243–254.
- Seppänen, E., Kuukka, H., Voutilainen, A., Huuskonen, H., and Peuhkuri, N. (2009). Metabolic depression and spleen and liver enlargement in juvenile Arctic charr *Salvelinus alpinus* exposed to chronic parasite infection. *J. Fish Biol.* *74*, 553–561.
- Wedekind, C., and Milinski, M. (1996). Do three-spined sticklebacks avoid consuming copepods, the first intermediate host of *Schistocephalus solidus*? — an experimental analysis of behavioural resistance. *Parasitology* *112*, 371–383.
